# Supplementary material for: Single-Cell Analysis of the Pan-Cancer Immune Microenvironment and scTIME Portal
Source: Oxford University Press journal article supplement (doi:10.1158/2326-6066.cir-20-1026), 2021-06-11
Supplement: cir-20-1026_table_s5_suppst5.xlsx [file cir-20-1026_table_s5_suppst5.xlsx]

## Sheet: Table S4 KEGG pathway enrichmen
geneDE	cancer	celltype	ID	Description	GeneRatio	BgRatio	pvalue	p.adjust	qvalue	geneID
up-regulated	Breast	CD4-IL7R	hsa03010	Ribosome	21/42	158/8087	1.25138e-25	1.03865e-23	1.02745e-23	6169/6233/6209/6147/6205/6154/6164/6207/6224/6142/6156/6222/6128/6161/6159/6228/6229/6130/6133/6234/6210
up-regulated	Breast	CD4-IL7R	hsa05171	Coronavirus disease - COVID-19	22/42	232/8087	1.33955e-23	5.55914e-22	5.49921e-22	6169/6233/6209/6147/6205/6154/6164/6207/6224/6142/6156/6222/6128/3558/6161/6159/6228/6229/6130/6133/6234/6210
up-regulated	Colon	Neutrophil	hsa03010	Ribosome	16/22	158/8087	1.40757e-23	3.23741e-22	3.11146e-22	6157/6143/6188/6147/6222/6208/6132/6191/6217/11224/6205/6141/6158/6134/6206/23521
up-regulated	Colon	Neutrophil	hsa05171	Coronavirus disease - COVID-19	16/22	232/8087	8.05712e-21	9.26569e-20	8.90524e-20	6157/6143/6188/6147/6222/6208/6132/6191/6217/11224/6205/6141/6158/6134/6206/23521
up-regulated	Liver	CD8-GZMK-FOS	hsa03010	Ribosome	20/269	158/8087	2.41994e-07	2.29762e-05	1.95562e-05	3921/6128/9045/6191/6170/6139/124995/6125/6232/6122/6144/6134/6231/6129/51187/6168/6188/2197/11224/6156
up-regulated	Liver	CD8-GZMK-FOS	hsa04650	Natural killer cell mediated cytotoxicity	18/269	131/8087	2.84645e-07	2.29762e-05	1.95562e-05	9437/3823/3822/22914/3812/3458/5880/5336/5530/836/5293/6850/2185/5594/3804/919/51744/5777
up-regulated	Liver	CD8-GZMK-FOS	hsa05020	Prion disease	27/269	273/8087	3.31111e-07	2.29762e-05	1.95562e-05	515/514/4708/1537/518/5689/1535/4697/5880/1327/203068/506/4696/5530/836/5293/498/6389/1350/5594/27089/7388/10382/5695/4694/1388/7381
up-regulated	Liver	CD8-GZMK-FOS	hsa00190	Oxidative phosphorylation	18/269	133/8087	3.59003e-07	2.29762e-05	1.95562e-05	515/514/4708/1537/518/4697/1327/10063/506/4696/529/498/6389/1350/27089/7388/4694/7381
up-regulated	Liver	CD8-GZMK-FOS	hsa05171	Coronavirus disease - COVID-19	24/269	232/8087	6.84262e-07	2.97922e-05	2.53576e-05	3921/6128/9045/6191/6170/6139/7297/6125/6232/6122/5336/6144/6134/5293/6850/6231/5594/6129/51187/6168/6188/2197/11224/6156
up-regulated	Liver	CD8-GZMK-FOS	hsa05012	Parkinson disease	25/269	249/8087	6.98254e-07	2.97922e-05	2.53576e-05	515/7314/514/4708/1537/518/5689/4697/1843/1327/203068/506/4696/836/805/498/6389/1350/27089/7388/10382/5695/4694/11315/7381
up-regulated	Liver	CD8-GZMK-FOS	hsa04612	Antigen processing and presentation	13/269	78/8087	1.45578e-06	5.32398e-05	4.53152e-05	3823/8302/3822/6892/2923/3812/3320/10197/3458/811/926/3804/4800
up-regulated	Liver	CD8-GZMK-FOS	hsa05014	Amyotrophic lateral sclerosis	30/269	364/8087	3.50988e-06	0.000112316	9.55981e-05	515/514/4708/2521/1537/518/5689/220988/4697/1327/203068/506/4696/5530/10133/836/7175/6432/498/6389/1350/27089/7388/10382/26100/5695/4694/23710/60/7381
up-regulated	Liver	CD8-GZMK-FOS	hsa05010	Alzheimer disease	29/269	369/8087	1.29968e-05	0.000369686	0.000314658	515/514/4708/1537/518/5689/4697/1499/1327/203068/506/4696/5530/836/5293/805/498/6389/1350/7976/5594/27089/7388/10382/26100/5695/4694/7381/102
up-regulated	Liver	CD8-GZMK-FOS	hsa05016	Huntington disease	25/269	306/8087	2.7791e-05	0.000711451	0.000605552	515/514/4708/1537/518/5689/4697/1173/1327/203068/506/4696/836/498/6389/1350/27089/6648/7388/10382/26100/5695/4694/5978/7381
up-regulated	Liver	CD8-GZMK-FOS	hsa05132	Salmonella infection	21/269	249/8087	7.88091e-05	0.0018341	0.0015611	5788/10627/3320/375/23265/1499/203068/10109/836/10096/5878/5293/5594/83658/391/9648/10382/1785/6188/10006/60
up-regulated	Liver	CD8-GZMK-FOS	hsa05022	Pathways of neurodegeneration - multiple diseases	32/269	475/8087	9.79648e-05	0.00208991	0.00177883	515/7314/514/4708/2521/1537/518/5689/4697/1499/1327/203068/506/4696/5530/10133/836/805/498/6389/1350/7976/5594/27089/7388/10382/26100/5695/4694/23710/11315/7381
up-regulated	Liver	CD8-GZMK-FOS	hsa04932	Non-alcoholic fatty liver disease	15/269	150/8087	0.000131958	0.00259856	0.00221177	4708/1537/4697/1327/4696/836/5293/6389/1350/83737/27089/7388/4694/51094/7381
up-regulated	Liver	CD8-GZMK-FOS	hsa04714	Thermogenesis	19/269	231/8087	0.000239642	0.00438203	0.00372977	515/514/4708/1537/518/4697/1327/10063/506/4696/84987/498/6389/1350/27089/7388/4694/60/7381
up-regulated	Liver	CD8-GZMK-FOS	hsa03018	RNA degradation	10/269	79/8087	0.000266466	0.00454768	0.00387076	694/2023/246175/64282/3313/29883/167227/55802/1656/8761
up-regulated	Liver	CD8-GZMK-FOS	hsa03015	mRNA surveillance pathway	10/269	97/8087	0.00137657	0.0207295	0.017644	2521/10914/5499/124540/5520/5521/8761/10921/80335/11052
up-regulated	Liver	CD8-GZMK-FOS	hsa04666	Fc gamma R-mediated phagocytosis	10/269	97/8087	0.00137657	0.0207295	0.017644	5788/5880/5336/10109/10096/5293/6850/5594/3635/1785
up-regulated	Liver	CD8-GZMK-FOS	hsa04662	B cell receptor signaling pathway	9/269	82/8087	0.00152633	0.0217079	0.0184767	5880/5336/5530/5293/6850/5594/3635/118788/5777
up-regulated	Liver	CD8-GZMK-FOS	hsa04141	Protein processing in endoplasmic reticulum	14/269	171/8087	0.00164099	0.0221102	0.0188191	2923/6748/10130/10134/23193/6746/3320/6745/56681/23190/811/55768/26270/1388
up-regulated	Liver	CD8-GZMK-FOS	hsa03013	RNA transport	14/269	186/8087	0.00357674	0.0457822	0.0389676	7329/8661/2521/60528/10209/8665/7175/10775/1964/8761/10921/1977/8667/6613
up-regulated	Liver	Cycling-T	hsa04110	Cell cycle	8/28	124/8087	5.85402e-09	3.16117e-07	2.27999e-07	4998/990/7272/1870/1111/8318/1869/5347
up-regulated	Liver	Macrophage-CXCL10	hsa04620	Toll-like receptor signaling pathway	8/85	104/8087	1.21145e-05	0.00158147	0.00133965	6349/7099/7100/3576/10454/3553/6373/7097
up-regulated	Liver	Macrophage-CXCL10	hsa05171	Coronavirus disease - COVID-19	11/85	232/8087	2.80734e-05	0.00158147	0.00133965	728/7099/6181/2162/712/714/3576/6169/3553/6228/7097
up-regulated	Liver	Macrophage-CXCL10	hsa05132	Salmonella infection	10/85	249/8087	0.000262458	0.00739256	0.00626215	6934/838/7099/3606/7100/3576/257397/10454/3553/7097
up-regulated	Liver	Macrophage-CXCL10	hsa04060	Cytokine-cytokine receptor interaction	9/85	295/8087	0.00366013	0.0490379	0.0415395	10148/6349/1441/3606/8808/3576/3597/3553/6373
up-regulated	Lung	CD4-CCR7-IL7R	hsa03010	Ribosome	18/93	158/8087	1.34256e-13	1.91986e-11	1.89372e-11	6209/6223/6136/6181/6222/6176/6217/6137/6135/6156/6165/6210/6157/6141/6160/6167/6143/6164
up-regulated	Lung	CD4-CCR7-IL7R	hsa05171	Coronavirus disease - COVID-19	19/93	232/8087	1.04071e-11	7.4411e-10	7.33977e-10	6209/6223/6136/6181/6222/6176/6217/6137/6135/6156/6165/6210/6157/6141/6160/6167/51284/6143/6164
up-regulated	Lung	CD4-CXCL13-Tfh	hsa03010	Ribosome	35/91	158/8087	2.20193e-37	2.70838e-35	2.70838e-35	6136/6181/6135/6156/6222/6137/6223/6233/6165/6164/6176/6235/6206/6188/6161/6169/6143/6217/6167/6210/6191/6160/6141/6209/6132/6154/6201/6134/6155/6194/6208/6157/6224/7311/6159
up-regulated	Lung	CD4-CXCL13-Tfh	hsa05171	Coronavirus disease - COVID-19	35/91	232/8087	3.59509e-31	2.21098e-29	2.21098e-29	6136/6181/6135/6156/6222/6137/6223/6233/6165/6164/6176/6235/6206/6188/6161/6169/6143/6217/6167/6210/6191/6160/6141/6209/6132/6154/6201/6134/6155/6194/6208/6157/6224/7311/6159
up-regulated	Lung	Cycling-Myeloid	hsa04060	Cytokine-cytokine receptor interaction	8/27	295/8087	3.4559e-06	0.000338678	0.000291023	6362/3624/3552/2921/8808/8741/55540/6374
up-regulated	Lung	Macrophage-AREG	hsa04060	Cytokine-cytokine receptor interaction	17/85	295/8087	7.67682e-09	1.43557e-06	1.3495e-06	8741/3552/3624/4283/655/3569/2921/6362/9547/56477/2919/1896/6364/654/6374/9966/656
up-regulated	Lung	Macrophage-AREG	hsa05323	Rheumatoid arthritis	9/85	93/8087	4.77336e-07	4.46309e-05	4.19553e-05	8741/3552/245972/3569/2921/2321/2919/6364/6374
up-regulated	Lung	Macrophage-AREG	hsa04061	Viral protein interaction with cytokine and cytokine receptor	9/85	100/8087	8.89386e-07	5.54384e-05	5.21149e-05	4283/3569/2921/6362/9547/56477/2919/6364/6374
up-regulated	Lung	Macrophage-AREG	hsa04062	Chemokine signaling pathway	8/85	192/8087	0.000879888	0.0235056	0.0220964	4283/2921/6362/9547/56477/2919/6364/6374
up-regulated	Lung	Macrophage-C1QC-PLTP	hsa04061	Viral protein interaction with cytokine and cytokine receptor	18/214	100/8087	8.9557e-11	2.3643e-08	2.12109e-08	6362/3569/2919/6374/6355/2921/4283/6364/2920/3559/6387/11009/6349/3576/8793/6347/6351/7124
up-regulated	Lung	Macrophage-C1QC-PLTP	hsa05323	Rheumatoid arthritis	17/214	93/8087	2.36757e-10	3.1252e-08	2.80371e-08	245972/3552/8741/3569/2919/6374/2921/1513/6364/2920/3553/6387/527/6349/3576/6347/7124
up-regulated	Lung	Macrophage-C1QC-PLTP	hsa04060	Cytokine-cytokine receptor interaction	27/214	295/8087	1.37132e-08	1.20676e-06	1.08262e-06	3552/6362/8741/3569/2919/655/6374/6355/2921/4283/6364/656/2920/3553/9966/3559/3624/55540/6387/149233/11009/6349/3576/8793/6347/6351/7124
up-regulated	Lung	Macrophage-C1QC-PLTP	hsa04657	IL-17 signaling pathway	14/214	94/8087	1.45004e-07	9.57027e-06	8.58577e-06	3569/2919/6374/2921/6364/2920/3553/55540/5743/4318/4792/3576/6347/7124
up-regulated	Lung	Macrophage-C1QC-PLTP	hsa04668	TNF signaling pathway	14/214	112/8087	1.3123e-06	6.92896e-05	6.21617e-05	3569/2919/6374/2921/6364/2920/3553/5743/4318/4792/4323/6347/182/7124
up-regulated	Lung	Macrophage-C1QC-PLTP	hsa05134	Legionellosis	9/214	57/8087	1.60526e-05	0.000706314	0.000633655	3569/2919/2921/2920/3553/1378/4792/3576/7124
up-regulated	Lung	Macrophage-C1QC-PLTP	hsa04064	NF-kappa B signaling pathway	11/214	104/8087	8.87796e-05	0.00334826	0.00300382	2919/2921/2920/3553/6387/10912/5743/4792/3576/6351/7124
up-regulated	Lung	Macrophage-C1QC-PLTP	hsa05133	Pertussis	9/214	76/8087	0.000164519	0.00542911	0.00487062	3552/3569/6374/716/3553/727/710/3576/7124
up-regulated	Lung	Macrophage-C1QC-PLTP	hsa04610	Complement and coagulation cascades	9/214	85/8087	0.000387123	0.0113556	0.0101874	5627/716/727/1378/710/7056/3075/7035/2162
up-regulated	Lung	Macrophage-C1QC-PLTP	hsa04062	Chemokine signaling pathway	14/214	192/8087	0.000551384	0.0145566	0.0130591	6362/2919/6374/6355/2921/4283/6364/2920/6387/6349/4792/3576/6347/6351
up-regulated	Lung	Macrophage-C1QC-PLTP	hsa04933	AGE-RAGE signaling pathway in diabetic complications	9/214	100/8087	0.00127087	0.0296938	0.0266391	3552/3569/4313/3553/51196/3576/7056/6347/7124
up-regulated	Lung	Macrophage-C1QC-PLTP	hsa05142	Chagas disease	9/214	102/8087	0.00146219	0.0296938	0.0266391	3569/3553/1636/2774/6349/4792/3576/6347/7124
up-regulated	Lung	Macrophage-C1QC-PLTP	hsa05146	Amoebiasis	9/214	102/8087	0.00146219	0.0296938	0.0266391	3569/2919/2921/2920/3553/3915/2774/3576/7124
up-regulated	Lung	Macrophage-C1QC-PLTP	hsa04620	Toll-like receptor signaling pathway	9/214	104/8087	0.00167604	0.0316054	0.0283541	3569/4283/1513/3553/6349/4792/3576/6351/7124
up-regulated	Lung	Macrophage-C1QC-PLTP	hsa05410	Hypertrophic cardiomyopathy	8/214	90/8087	0.00254178	0.0394723	0.0354117	3569/8516/59283/3479/1636/785/3674/7124
up-regulated	Lung	Macrophage-C1QC-PLTP	hsa04621	NOD-like receptor signaling pathway	12/214	181/8087	0.0030363	0.0445324	0.0399513	3569/2919/2921/2920/3553/84168/91662/4792/3576/6347/10628/7124
up-regulated	Lung	Macrophage-SPP1-ACP5	hsa04060	Cytokine-cytokine receptor interaction	23/168	295/8087	3.67506e-08	8.63639e-06	8.12381e-06	8741/3552/55540/3569/2919/9547/6362/6373/6355/9966/6364/6374/3553/5473/655/2921/4283/1896/2920/94/3559/3624/5618
up-regulated	Lung	Macrophage-SPP1-ACP5	hsa04061	Viral protein interaction with cytokine and cytokine receptor	13/168	100/8087	1.2502e-07	1.46898e-05	1.3818e-05	3569/2919/9547/6362/6373/6355/6364/6374/5473/2921/4283/2920/3559
up-regulated	Lung	Macrophage-SPP1-ACP5	hsa05323	Rheumatoid arthritis	11/168	93/8087	3.1317e-06	0.000245317	0.000230757	8741/245972/3552/3569/2919/1513/6364/6374/3553/2921/2920
up-regulated	Lung	Macrophage-SPP1-ACP5	hsa05410	Hypertrophic cardiomyopathy	8/168	90/8087	0.000535252	0.0280652	0.0263996	3569/8516/8515/3696/60/3674/785/59283
up-regulated	Lung	Macrophage-SPP1-ACP5	hsa04062	Chemokine signaling pathway	12/168	192/8087	0.000632564	0.0280652	0.0263996	2919/9547/6362/6373/6355/6364/6374/5473/2921/4283/2920/55970
up-regulated	Lung	Macrophage-SPP1-ACP5	hsa04657	IL-17 signaling pathway	8/168	94/8087	0.000716559	0.0280652	0.0263996	55540/3569/2919/6364/6374/3553/2921/2920
up-regulated	Lung	Macrophage-SPP1-CLEC5A	hsa04657	IL-17 signaling pathway	13/225	94/8087	1.73518e-06	0.000277552	0.000257405	6374/3569/55540/2919/4312/3627/6364/1437/7124/4318/8061/2921/3553
up-regulated	Lung	Macrophage-SPP1-CLEC5A	hsa04060	Cytokine-cytokine receptor interaction	24/225	295/8087	2.06358e-06	0.000277552	0.000257405	3552/8741/6374/3569/55540/6362/9966/2919/655/4283/3624/6355/94/656/56477/3627/6367/8808/6364/1437/7124/2921/3553/4804
up-regulated	Lung	Macrophage-SPP1-CLEC5A	hsa05323	Rheumatoid arthritis	12/225	93/8087	9.13999e-06	0.000819553	0.000760062	3552/8741/6374/3569/245972/2919/4312/6364/1437/7124/2921/3553
up-regulated	Lung	Macrophage-SPP1-CLEC5A	hsa04061	Viral protein interaction with cytokine and cytokine receptor	12/225	100/8087	1.94109e-05	0.00130538	0.00121063	6374/3569/6362/2919/4283/6355/56477/3627/6367/6364/7124/2921
up-regulated	Lung	Macrophage-SPP1-CLEC5A	hsa05133	Pertussis	9/225	76/8087	0.000239788	0.0103291	0.00957931	3552/6374/3569/713/710/712/714/7124/3553
up-regulated	Lung	Macrophage-SPP1-CLEC5A	hsa04668	TNF signaling pathway	11/225	112/8087	0.000268786	0.0103291	0.00957931	6374/3569/2919/3627/6364/4323/1437/7124/4318/2921/3553
up-regulated	Lung	Macrophage-SPP1-CLEC5A	hsa04610	Complement and coagulation cascades	9/225	85/8087	0.000558124	0.0187669	0.0174047	5055/2162/713/710/712/714/2/5627/5328
up-regulated	Lung	Macrophage-SPP1-CLEC5A	hsa05410	Hypertrophic cardiomyopathy	9/225	90/8087	0.000849064	0.0253776	0.0235355	3569/59283/8515/1636/7124/785/3693/60/3696
up-regulated	Lung	Macrophage-SPP1-CLEC5A	hsa03320	PPAR signaling pathway	8/225	76/8087	0.00117301	0.031554	0.0292636	440503/4023/4199/4312/1593/5360/23205/10062
up-regulated	Lung	Macrophage-SPP1-CLEC5A	hsa05146	Amoebiasis	9/225	102/8087	0.00206553	0.0463023	0.0429412	3569/2919/1437/7124/2767/2921/3915/3911/3553
up-regulated	Lung	Neutrophil	hsa05418	Fluid shear stress and atherosclerosis	9/57	139/8087	4.51204e-07	7.53511e-05	6.26936e-05	3552/7132/7850/653361/5880/60/71/1906/808
up-regulated	Lung	Neutrophil	hsa04380	Osteoclast differentiation	8/57	128/8087	2.72699e-06	0.000227704	0.000189454	2215/8061/3552/10326/7132/653361/10288/2214
up-regulated	Lung	Neutrophil	hsa04613	Neutrophil extracellular trap formation	8/57	190/8087	4.93978e-05	0.00274981	0.0022879	2215/23569/1378/653361/5880/2214/60/71
up-regulated	Melanoma	B-memory	hsa04662	B cell receptor signaling pathway	14/245	82/8087	1.32749e-07	3.75679e-05	3.49339e-05	1380/975/25780/933/4792/930/4067/5594/695/5336/10892/84433/3636/8915
up-regulated	Melanoma	B-memory	hsa00190	Oxidative phosphorylation	13/245	133/8087	0.000185713	0.0262785	0.024436	515/10476/526/27089/7385/55967/4708/7386/4695/9167/527/1345/155066
up-regulated	Melanoma	CD4-CD8-IFIT1	hsa03010	Ribosome	21/141	158/8087	2.53576e-13	5.14759e-11	4.61775e-11	25873/6210/6165/6154/6158/6157/6235/6229/2197/6201/6142/6168/6167/6189/6232/6234/6187/6193/6159/6139/4736
up-regulated	Melanoma	CD4-CD8-IFIT1	hsa05171	Coronavirus disease - COVID-19	22/141	232/8087	6.42864e-11	6.52507e-09	5.85345e-09	25873/6210/6165/6154/6158/6157/6235/6229/2197/6201/6142/6168/6167/6189/6232/6234/6187/6193/6159/6139/4792/4736
up-regulated	Melanoma	CD4-CD8-IFIT1	hsa03040	Spliceosome	10/141	151/8087	0.000291638	0.0197342	0.0177029	25804/1655/3190/151903/2521/6428/6633/9092/1659/988
up-regulated	Melanoma	CD4-CXCL13-Tfh	hsa05012	Parkinson disease	16/128	249/8087	1.72546e-06	0.000412386	0.00034146	5714/1350/518/7388/522/7385/9451/5719/4726/27089/7295/7277/5707/2778/805/2773
up-regulated	Melanoma	CD4-CXCL13-Tfh	hsa05014	Amyotrophic lateral sclerosis	18/128	364/8087	1.52193e-05	0.00181871	0.00150591	6647/5714/2475/1350/518/6396/7388/522/7385/9451/5719/5903/4726/27089/3178/7277/3181/5707
up-regulated	Melanoma	CD4-CXCL13-Tfh	hsa05020	Prion disease	14/128	273/8087	9.86208e-05	0.00785679	0.00650552	6647/5714/857/1350/518/7388/522/7385/9451/5719/4726/27089/7277/5707
up-regulated	Melanoma	CD4-CXCL13-Tfh	hsa05010	Alzheimer disease	16/128	369/8087	0.000220694	0.0131865	0.0109186	5714/2475/4023/1350/518/7388/522/7385/9451/5719/4726/27089/7277/5707/805/207
up-regulated	Melanoma	CD4-CXCL13-Tfh	hsa05016	Huntington disease	14/128	306/8087	0.000324895	0.01553	0.012859	6647/5714/3064/2475/1350/518/7388/522/7385/5719/4726/27089/7277/5707
up-regulated	Melanoma	CD4-CXCL13-Tfh	hsa04611	Platelet activation	8/128	124/8087	0.000749917	0.0298717	0.0247341	5501/3937/5906/2778/6093/207/103910/2773
up-regulated	Melanoma	CD4-CXCL13-Tfh	hsa00190	Oxidative phosphorylation	8/128	133/8087	0.00118561	0.0404803	0.0335181	10632/1350/518/7388/522/7385/4726/27089
up-regulated	Melanoma	CD4-IL7R	hsa05014	Amyotrophic lateral sclerosis	9/32	364/8087	7.66919e-06	0.000624754	0.000482821	7388/3178/5694/6428/513/539/468/5688/4725
up-regulated	Melanoma	CD4-IL7R	hsa05020	Prion disease	8/32	273/8087	7.90828e-06	0.000624754	0.000482821	7388/5694/513/539/468/5688/4725/5295
up-regulated	Melanoma	CD4-IL7R	hsa05010	Alzheimer disease	8/32	369/8087	6.98064e-05	0.00220588	0.00170474	7388/5694/513/539/468/5688/4725/5295
up-regulated	Melanoma	CD8-PDCD1	hsa03040	Spliceosome	15/239	151/8087	3.71263e-05	0.00954146	0.00859767	5093/11325/55660/56259/9775/4670/55119/3178/3305/3303/57187/9939/153527/24148/5356
up-regulated	Melanoma	CD8-PDCD1	hsa05131	Shigellosis	18/239	246/8087	0.000344691	0.0442928	0.0399116	5879/7314/5588/7132/9844/7094/826/10109/8737/10095/103910/8878/81873/998/3059/10616/9474/7316
up-regulated	Melanoma	CD8-transition	hsa03010	Ribosome	78/304	158/8087	4.8037e-71	1.06642e-68	9.50627e-69	6203/6144/6189/6152/25873/6134/6209/6234/23521/6129/2197/6193/6158/6141/6224/6165/6188/6159/6138/6168/6137/6133/7311/6122/6125/6229/6232/3921/6210/6205/6235/6223/6202/6124/6167/6150/4736/6161/6160/6156/6228/51065/6164/6139/6135/6194/6208/6154/6176/6170/6187/6207/6136/6230/9045/6169/6130/9349/6227/6217/6132/64983/6142/6146/6143/11224/6157/6233/6155/28998/6181/6231/6204/6175/6191/6166/6206/54460
up-regulated	Melanoma	CD8-transition	hsa05171	Coronavirus disease - COVID-19	77/304	232/8087	5.07191e-54	5.62982e-52	5.01853e-52	6203/6144/6189/6152/25873/6134/6209/6234/23521/6129/2197/6193/6158/6141/6224/6165/6188/6159/6138/6168/6137/6133/7311/6122/6125/6229/6232/7132/3921/6210/6205/6235/6223/6202/6124/6167/4736/6161/6160/6156/6228/51065/6164/6139/6135/6194/6208/6154/6176/6170/6187/6207/6136/6230/9045/6169/6130/9349/6227/6217/6132/6142/6146/6143/11224/3454/6157/6233/6155/6181/6231/6204/6175/6191/6166/6206/9636
up-regulated	Melanoma	CD8-transition	hsa00190	Oxidative phosphorylation	33/304	133/8087	1.09322e-18	8.08985e-17	7.21143e-17	1327/9550/10632/4728/27089/8992/1345/1340/7381/10312/1350/509/537/4707/7384/515/4709/4710/9296/1329/4696/513/4697/4713/4725/1351/518/527/10476/54539/4704/1347/514
up-regulated	Melanoma	CD8-transition	hsa05012	Parkinson disease	43/304	249/8087	1.23279e-17	6.84198e-16	6.09907e-16	1327/4728/7311/5695/27089/1345/1340/7381/7316/1350/509/7314/4707/7384/515/4709/4710/5685/10213/1329/3799/4696/513/4697/4713/4725/27429/1351/518/7494/7327/10476/5689/5693/6233/54539/808/4704/1347/514/5710/7295/5706
up-regulated	Melanoma	CD8-transition	hsa05014	Amyotrophic lateral sclerosis	44/304	364/8087	3.03384e-12	1.34703e-10	1.20076e-10	2876/1327/4728/5695/27089/7132/1345/8878/1340/7381/3178/1350/509/4707/7384/515/4709/4710/5685/10213/1329/3799/4696/513/4697/4713/4725/1351/518/5216/7494/71/311/10476/5689/5693/54539/7133/4704/1347/514/5710/60/5706
up-regulated	Melanoma	CD8-transition	hsa05016	Huntington disease	39/304	306/8087	1.15536e-11	4.27484e-10	3.81067e-10	2876/1327/4728/5695/27089/1175/1345/1340/7381/1350/509/4707/7384/515/1211/4709/4710/5685/10213/1329/3799/4696/513/4697/4713/4725/1351/518/6908/10476/5689/5693/54539/4704/841/1347/514/5710/5706
up-regulated	Melanoma	CD8-transition	hsa05022	Pathways of neurodegeneration - multiple diseases	49/304	475/8087	5.55581e-11	1.76199e-09	1.57067e-09	2876/1327/4728/7311/5695/27089/7132/1345/8878/1340/7381/1459/7316/1350/509/10023/7314/4707/7384/515/4709/4710/5685/10213/1329/3799/4696/513/4697/4713/4725/27429/1351/518/7494/7327/10476/5689/5693/6233/54539/808/7133/4704/841/1347/514/5710/5706
up-regulated	Melanoma	CD8-transition	hsa04714	Thermogenesis	32/304	231/8087	1.07265e-10	2.9766e-09	2.6534e-09	1327/10632/4728/27089/1345/1340/7381/1350/509/6194/4707/7384/515/4709/4710/1329/4696/513/4697/4713/4725/1351/518/84987/51241/71/10476/54539/4704/1347/514/60
up-regulated	Melanoma	CD8-transition	hsa05020	Prion disease	35/304	273/8087	1.22403e-10	3.01927e-09	2.69143e-09	1327/4728/5695/27089/1345/1340/7381/1459/1350/509/4707/7384/515/4709/4710/5685/10213/1329/3799/4696/513/4697/4713/4725/1351/518/10476/5689/5693/54539/4704/1347/514/5710/5706
up-regulated	Melanoma	CD8-transition	hsa05010	Alzheimer disease	41/304	369/8087	2.63081e-10	5.84039e-09	5.20623e-09	1327/4728/5695/27089/7132/1345/1340/7381/1459/1350/509/10023/4707/7384/515/4709/4710/5685/10213/1329/3799/4696/513/4697/4713/4725/1351/518/7494/102/10476/5689/5693/54539/808/4704/841/1347/514/5710/5706
up-regulated	Melanoma	CD8-transition	hsa04932	Non-alcoholic fatty liver disease	24/304	150/8087	1.37723e-09	2.7795e-08	2.4777e-08	1327/4728/27089/7132/1345/1340/7381/1350/4707/7384/4709/4710/1329/4696/4697/4713/4725/1351/7494/54539/4704/841/1347/22877
up-regulated	Melanoma	CD8-transition	hsa05110	Vibrio cholerae infection	11/304	50/8087	1.78012e-06	3.29322e-05	2.93563e-05	9550/11014/8992/10952/10312/537/23480/9296/527/71/60
up-regulated	Melanoma	CD8-transition	hsa03050	Proteasome	9/304	46/8087	4.29888e-05	0.000734116	0.000654404	5695/5685/10213/5721/5689/5693/51371/5710/5706
up-regulated	Melanoma	CD8-transition	hsa04260	Cardiac muscle contraction	12/304	87/8087	9.05809e-05	0.00143635	0.00128039	1327/27089/1345/1340/7381/1350/7384/1329/476/1351/1347/7171
up-regulated	Melanoma	CD8-transition	hsa04141	Protein processing in endoplasmic reticulum	16/304	171/8087	0.000680353	0.0100692	0.00897589	5887/573/27248/10960/10952/10961/56886/3326/23480/821/6500/2923/7494/7327/6747/9695
up-regulated	Melanoma	CD8-transition	hsa04137	Mitophagy - animal	9/304	68/8087	0.000931085	0.0129188	0.011516	7311/8878/1459/7316/7314/3091/6233/7030/665
up-regulated	Melanoma	CD8-transition	hsa05130	Pathogenic Escherichia coli infection	17/304	197/8087	0.00116513	0.0152152	0.0135631	10095/6188/7132/5062/7009/29108/10109/10092/387/10972/71/6093/4641/10093/841/9368/60
up-regulated	Melanoma	CD8-transition	hsa05131	Shigellosis	19/304	246/8087	0.00225801	0.0278488	0.0248249	10095/7311/103910/7132/8878/831/7316/29108/10109/10092/7314/387/6500/5216/71/6093/6233/10093/60
up-regulated	Melanoma	CD8-transition	hsa05132	Salmonella infection	19/304	249/8087	0.00259	0.0302621	0.0269762	10095/6188/103910/7132/29108/10109/10092/3326/387/3799/6500/5216/71/5294/10093/841/5788/60/7295
up-regulated	Melanoma	CD8-transition	hsa03013	RNA transport	15/304	186/8087	0.00428036	0.0452495	0.0403362	1915/5411/8761/1974/10209/2332/10284/8667/26019/1982/8666/10775/26986/55110/6612
up-regulated	Melanoma	Cycling-T	hsa00190	Oxidative phosphorylation	21/105	133/8087	1.38467e-17	2.45087e-15	2.25921e-15	527/9296/1347/1351/1349/1337/374291/7381/1327/10632/1340/4725/4708/7388/4707/513/522/27089/514/4715/539
up-regulated	Melanoma	Cycling-T	hsa05012	Parkinson disease	23/105	249/8087	5.80875e-14	5.14075e-12	4.73872e-12	10376/7314/1347/1351/1349/1337/374291/7381/1327/1340/4725/4708/7388/7332/4707/513/522/27089/514/4715/539/7295/2778
up-regulated	Melanoma	Cycling-T	hsa04714	Thermogenesis	20/105	231/8087	1.05587e-11	6.22966e-10	5.74247e-10	1347/1351/1349/1337/374291/7381/1327/10632/1340/4725/4708/7388/4707/513/522/27089/514/4715/539/2778
up-regulated	Melanoma	Cycling-T	hsa05020	Prion disease	21/105	273/8087	2.90311e-11	1.28462e-09	1.18416e-09	10376/1347/1351/1349/6647/1460/1337/374291/7381/1327/1340/4725/4708/7388/4707/513/522/27089/514/4715/539
up-regulated	Melanoma	Cycling-T	hsa05014	Amyotrophic lateral sclerosis	23/105	364/8087	1.58659e-10	5.61653e-09	5.1773e-09	10376/3178/1347/1351/1349/6647/1337/374291/7381/1327/1340/4725/4708/7388/23511/55102/4707/513/522/27089/514/4715/539
up-regulated	Melanoma	Cycling-T	hsa05016	Huntington disease	21/105	306/8087	2.48034e-10	7.31701e-09	6.74479e-09	10376/1347/1351/1349/6647/1337/374291/7381/1327/1340/4725/4708/7388/55102/4707/513/522/27089/514/4715/539
up-regulated	Melanoma	Cycling-T	hsa04932	Non-alcoholic fatty liver disease	15/105	150/8087	6.95585e-10	1.75884e-08	1.62129e-08	1347/1351/1349/356/1337/374291/7381/1327/1340/4725/4708/7388/4707/27089/4715
up-regulated	Melanoma	Cycling-T	hsa05022	Pathways of neurodegeneration - multiple diseases	25/105	475/8087	1.07086e-09	2.36927e-08	2.18398e-08	10376/7314/1347/1351/1349/6647/356/1460/1337/374291/7381/1327/1340/4725/4708/7388/7332/55102/4707/513/522/27089/514/4715/539
up-regulated	Melanoma	Cycling-T	hsa05010	Alzheimer disease	22/105	369/8087	1.28468e-09	2.52654e-08	2.32896e-08	10376/1347/1351/1349/2597/1460/1337/374291/7381/1327/1340/4725/4708/7388/55102/4707/513/522/27089/514/4715/539
up-regulated	Melanoma	Cycling-T	hsa04260	Cardiac muscle contraction	9/105	87/8087	1.64163e-06	2.90569e-05	2.67845e-05	1347/1351/1349/1337/7381/1327/1340/7388/27089
up-regulated	Melanoma	Cycling-T	hsa03013	RNA transport	9/105	186/8087	0.000667025	0.010733	0.00989368	1964/9086/10284/7341/50628/5411/23511/9775/8667
up-regulated	Melanoma	Cycling-T	hsa03040	Spliceosome	8/105	151/8087	0.000741158	0.0109321	0.0100771	6434/3178/6427/6429/6633/9775/27316/4670
up-regulated	Melanoma	MAST	hsa04660	T cell receptor signaling pathway	17/188	104/8087	1.92425e-10	4.90684e-08	4.4359e-08	926/925/5133/5063/915/3932/940/5533/10125/7535/1493/919/2534/917/8440/5595/5788
up-regulated	Melanoma	MAST	hsa05162	Measles	16/188	139/8087	1.19195e-07	1.45658e-05	1.31679e-05	915/356/940/3560/3661/1017/8717/4940/3561/3716/4599/6777/9641/7187/25898/917
up-regulated	Melanoma	MAST	hsa04658	Th1 and Th2 cell differentiation	13/188	92/8087	1.71363e-07	1.45658e-05	1.31679e-05	915/3932/5533/3560/6775/7535/864/919/3561/3716/6777/917/5595
up-regulated	Melanoma	MAST	hsa05340	Primary immunodeficiency	8/188	38/8087	1.9779e-06	0.000126091	0.000113989	926/925/3575/915/3932/7535/3561/5788
up-regulated	Melanoma	MAST	hsa05235	PD-L1 expression and PD-1 checkpoint pathway in cancer	11/188	89/8087	6.02125e-06	0.000307084	0.000277612	5133/915/3932/940/5533/10125/7535/919/3716/917/5595
up-regulated	Melanoma	MAST	hsa04514	Cell adhesion molecules	14/188	149/8087	8.64501e-06	0.000367413	0.00033215	926/914/7412/925/5133/940/6404/3689/3695/201633/1493/3688/3683/5788
up-regulated	Melanoma	MAST	hsa04650	Natural killer cell mediated cytotoxicity	13/188	131/8087	1.0091e-05	0.000367599	0.000332319	4068/22914/3932/356/5533/3689/7535/3002/10870/919/2534/5595/3683
up-regulated	Melanoma	MAST	hsa04659	Th17 cell differentiation	11/188	107/8087	3.55108e-05	0.00113191	0.00102327	915/3932/5533/3560/7535/919/3561/3716/6777/917/5595
up-regulated	Melanoma	MAST	hsa05166	Human T-cell leukemia virus 1 infection	15/188	219/8087	0.000168814	0.00478308	0.00432402	915/3932/5533/109/3560/3689/545/2113/1017/3561/3716/6777/917/5595/3683
up-regulated	Melanoma	MAST	hsa04640	Hematopoietic cell lineage	9/188	99/8087	0.00046759	0.0116768	0.0105562	926/914/925/3575/924/915/921/3590/917
up-regulated	Melanoma	MAST	hsa04061	Viral protein interaction with cytokine and cytokine receptor	9/188	100/8087	0.000503707	0.0116768	0.0105562	1234/10563/2833/3560/3587/1236/3561/6352/7133
up-regulated	Melanoma	MAST	hsa04210	Apoptosis	10/188	136/8087	0.00122246	0.0249074	0.0225169	356/2081/8717/824/3002/1521/153090/7277/5595/4170
up-regulated	Melanoma	MAST	hsa05170	Human immunodeficiency virus 1 infection	13/188	212/8087	0.00129692	0.0249074	0.0225169	1234/164668/5063/915/356/5533/3661/545/8717/919/917/5595/7133
up-regulated	Melanoma	MAST	hsa04060	Cytokine-cytokine receptor interaction	16/188	295/8087	0.00136747	0.0249074	0.0225169	1234/10563/3575/356/9235/8718/939/2833/3560/10663/3587/1236/3590/3561/6352/7133
up-regulated	Melanoma	MAST	hsa05164	Influenza A	11/188	171/8087	0.00208409	0.0354295	0.0320292	356/3661/11100/8717/4940/3716/6352/4599/9641/7187/5595
up-regulated	Melanoma	MAST	hsa05169	Epstein-Barr virus infection	12/188	202/8087	0.00258222	0.0411542	0.0372044	915/3661/1017/8717/864/919/4940/3716/9641/7187/917/3683
up-regulated	Melanoma	MAST	hsa04621	NOD-like receptor signaling pathway	11/188	181/8087	0.00324654	0.0475078	0.0429482	9051/115362/23710/3661/4940/3716/6352/9641/7187/2634/5595
up-regulated	Melanoma	MAST	hsa04360	Axon guidance	11/188	182/8087	0.00338686	0.0475078	0.0429482	5063/817/5533/9901/55558/2041/2534/8440/5727/3688/5595
up-regulated	Melanoma	MAST	hsa05160	Hepatitis C	10/188	157/8087	0.0035398	0.0475078	0.0429482	356/3661/1017/8717/4940/3716/4599/9641/7187/5595
up-regulated	Melanoma	Neutrophil	hsa04061	Viral protein interaction with cytokine and cytokine receptor	15/134	100/8087	6.77291e-11	1.35458e-08	1.27616e-08	5473/6374/8794/6387/3627/6373/6367/4283/6355/2919/3569/1436/3579/8793/6362
up-regulated	Melanoma	Neutrophil	hsa04060	Cytokine-cytokine receptor interaction	22/134	295/8087	2.37958e-09	2.37958e-07	2.24182e-07	5473/6374/8794/6387/3627/5618/6373/6367/4283/6355/10148/2919/3569/4804/943/1436/3579/8793/7043/3624/6362/5008
up-regulated	Melanoma	Neutrophil	hsa04062	Chemokine signaling pathway	12/134	192/8087	7.62451e-05	0.00508301	0.00478873	5473/6374/6387/3627/6373/6367/4283/6355/2919/2791/3579/6362
up-regulated	Melanoma	NK-FCGR3A	hsa05132	Salmonella infection	15/149	249/8087	5.10064e-05	0.0117825	0.0100402	103910/55860/4792/8743/5898/4074/23265/375/382/55845/998/29108/7186/10109/4609
up-regulated	Melanoma	NK-FCGR3A	hsa05135	Yersinia infection	10/149	137/8087	0.000206998	0.0239083	0.020373	3688/4792/382/998/10163/29108/7186/10109/7535/5829
up-regulated	Melanoma	NK-FCGR3A	hsa05131	Shigellosis	13/149	246/8087	0.000588378	0.0336653	0.0286872	3688/103910/4792/81/375/382/998/10163/29108/7186/10109/5588/5829
up-regulated	Melanoma	NK-FCGR3A	hsa05012	Parkinson disease	13/149	249/8087	0.000659527	0.0336653	0.0286872	1345/2778/7494/5688/4708/5694/5687/4705/514/1327/801/805/1350
up-regulated	Melanoma	NK-FCGR3A	hsa00190	Oxidative phosphorylation	9/149	133/8087	0.000750343	0.0336653	0.0286872	1345/4708/10312/4705/514/1327/527/521/1350
up-regulated	Melanoma	NK-FCGR3A	hsa05130	Pathogenic Escherichia coli infection	11/149	197/8087	0.000998456	0.0336653	0.0286872	3688/4792/8743/375/382/55845/998/10163/29108/7186/10109
up-regulated	Melanoma	NK-FCGR3A	hsa05014	Amyotrophic lateral sclerosis	16/149	364/8087	0.001047	0.0336653	0.0286872	311/1345/7494/5688/3178/4708/55860/5694/5687/4705/3181/514/1327/23225/7186/1350
up-regulated	Melanoma	NK-FCGR3A	hsa04670	Leukocyte transendothelial migration	8/149	114/8087	0.0011659	0.0336653	0.0286872	3688/103910/81/5908/998/83593/3684/5829
up-regulated	Melanoma	NK-FCGR3A	hsa04932	Non-alcoholic fatty liver disease	9/149	150/8087	0.00175589	0.0405611	0.0345633	1345/7494/4708/4705/998/1327/5571/7186/1350
up-regulated	PDAC	CD8-ZNF683	hsa04610	Complement and coagulation cascades	12/232	85/8087	4.82522e-06	0.00127868	0.00120377	715/710/5265/5327/718/2/1604/3426/5627/966/5054/7056
up-regulated	PDAC	CD8-ZNF683	hsa05418	Fluid shear stress and atherosclerosis	14/232	139/8087	4.19267e-05	0.00555529	0.0052298	5327/6382/4313/10365/857/1728/1906/653361/6347/4258/5747/445/4780/7056
up-regulated	PDAC	CD8-ZNF683	hsa04061	Viral protein interaction with cytokine and cytokine receptor	10/232	100/8087	0.000561041	0.037169	0.0349912	2921/4055/6364/2919/6347/3561/1235/2920/6375/1435
up-regulated	PDAC	CD8-ZNF683	hsa04933	AGE-RAGE signaling pathway in diabetic complications	10/232	100/8087	0.000561041	0.037169	0.0349912	4313/1281/595/1284/1906/6347/5054/2335/1278/7056
up-regulated	PDAC	CD8-ZNF683	hsa05205	Proteoglycans in cancer	15/232	205/8087	0.000790406	0.0418915	0.0394371	3339/7078/6382/2017/4313/1634/595/5058/857/22808/5747/2335/5962/2317/1278
up-regulated	PDAC	CD8-ZNF683	hsa04668	TNF signaling pathway	10/232	112/8087	0.0013598	0.0476756	0.0448823	2921/6364/2919/1906/6347/3659/7185/2920/1435/841
up-regulated	PDAC	CD8-ZNF683	hsa04657	IL-17 signaling pathway	9/232	94/8087	0.00143926	0.0476756	0.0448823	3934/2921/6364/2919/6347/132014/4312/2920/841
up-regulated	PDAC	Cycling-B	hsa05219	Bladder cancer	8/198	41/8087	5.35284e-06	0.00129003	0.00103113	1870/1869/4312/5925/4313/1839/5595/5604
up-regulated	PDAC	Cycling-B	hsa05130	Pathogenic Escherichia coli infection	16/198	197/8087	2.43534e-05	0.00293458	0.00234561	347733/60/7280/71/10097/7430/7846/23191/2597/55971/51135/10109/7456/3059/5595/9266
up-regulated	PDAC	Cycling-B	hsa04810	Regulation of actin cytoskeleton	16/198	218/8087	8.33428e-05	0.00669521	0.00535149	60/1072/5216/7114/10298/22800/71/10097/80310/7430/7414/23191/10109/54776/5595/5604
up-regulated	PDAC	Cycling-B	hsa04666	Fc gamma R-mediated phagocytosis	10/198	97/8087	0.000121726	0.007334	0.00586208	65108/1072/3635/5788/10097/207/10109/5580/5595/5604
up-regulated	PDAC	Cycling-B	hsa04662	B cell receptor signaling pathway	9/198	82/8087	0.000164826	0.0079446	0.00635013	933/3635/971/118788/207/5534/1380/5595/5604
up-regulated	PDAC	Cycling-B	hsa05132	Salmonella infection	16/198	249/8087	0.000385608	0.0154886	0.0123801	347733/60/5216/7280/71/5788/10097/7846/23191/2597/51135/207/10109/5595/9266/5604
up-regulated	PDAC	Cycling-B	hsa05214	Glioma	8/198	75/8087	0.000463902	0.0155251	0.0124093	1870/1869/5925/8536/207/5595/817/5604
up-regulated	PDAC	Cycling-B	hsa05135	Yersinia infection	11/198	137/8087	0.000515357	0.0155251	0.0124093	60/71/10097/51135/207/10109/7456/8935/5595/3932/5604
up-regulated	PDAC	Cycling-B	hsa05131	Shigellosis	15/198	246/8087	0.00100768	0.0269834	0.0215678	60/5216/7188/71/23048/5332/10097/7414/207/10109/823/5580/3059/5595/9266
up-regulated	PDAC	Cycling-B	hsa04218	Cellular senescence	11/198	156/8087	0.00151258	0.0364532	0.0291371	1870/1869/22800/677/5925/207/5534/823/5595/5604/890
up-regulated	PDAC	Cycling-B	hsa04912	GnRH signaling pathway	8/198	93/8087	0.00192561	0.0386727	0.0309111	4323/5332/4313/5580/1839/5595/817/5604
up-regulated	PDAC	Cycling-B	hsa05215	Prostate cancer	8/198	97/8087	0.00251498	0.0430531	0.0344124	1870/1869/80310/148327/5925/207/5595/5604
up-regulated	PDAC	Cycling-B	hsa01522	Endocrine resistance	8/198	98/8087	0.00268234	0.0430531	0.0344124	1870/1869/5925/4313/207/1839/5595/5604
up-regulated	PDAC	Cycling-B	hsa04640	Hematopoietic cell lineage	8/198	99/8087	0.00285829	0.0430531	0.0344124	933/1436/951/931/2208/1380/909/4311
up-regulated	PDAC	Cycling-T	hsa04610	Complement and coagulation cascades	15/232	85/8087	1.40949e-08	3.65057e-06	3.10087e-06	713/714/712/718/2152/2/11326/7056/5265/5328/710/716/3426/2162/5329
up-regulated	PDAC	Cycling-T	hsa05146	Amoebiasis	14/232	102/8087	1.09164e-06	0.000141368	0.000120081	929/913/7099/1278/911/7097/912/1277/909/2776/1281/2335/2920/3915
up-regulated	PDAC	Cycling-T	hsa04611	Platelet activation	14/232	124/8087	1.1403e-05	0.000984462	0.000836223	2212/1278/4067/6850/2207/1277/695/6714/2776/1281/6916/2771/7094/3709
up-regulated	PDAC	Cycling-T	hsa05150	Staphylococcus aureus infection	12/232	96/8087	1.73359e-05	0.0011225	0.000953476	713/2212/2357/714/712/718/5724/2209/2359/716/3426/2213
up-regulated	PDAC	Cycling-T	hsa04015	Rap1 signaling pathway	18/232	210/8087	3.10923e-05	0.00161058	0.00136806	1436/2357/9771/9732/3643/1969/1942/7422/1500/55740/9564/6714/2776/999/2771/7094/3397/5228
up-regulated	PDAC	Cycling-T	hsa05133	Pertussis	10/232	76/8087	5.64111e-05	0.00243508	0.00206841	713/929/714/712/718/7099/114548/710/716/2771
up-regulated	PDAC	Cycling-T	hsa04380	Osteoclast differentiation	13/232	128/8087	7.24423e-05	0.00268037	0.00227676	6688/1436/2212/54209/140885/11006/3460/7305/6850/2209/695/2213/10859
up-regulated	PDAC	Cycling-T	hsa04933	AGE-RAGE signaling pathway in diabetic complications	11/232	100/8087	0.000127696	0.00413417	0.00351165	1536/2152/1278/7056/7422/595/1277/1281/2335/5580/1958
up-regulated	PDAC	Cycling-T	hsa05152	Tuberculosis	15/232	180/8087	0.000196874	0.00566559	0.00481247	2212/929/718/3460/3606/7099/6850/7097/2207/2209/6714/64581/2213/972/9902
up-regulated	PDAC	Cycling-T	hsa04978	Mineral absorption	8/232	59/8087	0.000254963	0.00606637	0.0051529	6546/4499/26872/30061/7779/481/4495/4496
up-regulated	PDAC	Cycling-T	hsa05205	Proteoglycans in cancer	16/232	205/8087	0.000257645	0.00606637	0.0051529	7078/1634/7474/7099/1278/7422/595/5328/7097/1277/6714/3339/2335/5058/5329/3709
up-regulated	PDAC	Cycling-T	hsa05202	Transcriptional misregulation in cancer	15/232	192/8087	0.000396952	0.00856755	0.00727746	6688/1436/4208/929/2119/4005/5328/2209/3087/55589/3486/8842/604/64332/942
up-regulated	PDAC	Cycling-T	hsa04666	Fc gamma R-mediated phagocytosis	10/232	97/8087	0.000439334	0.00875288	0.00743488	4082/2212/3055/4067/6850/2209/2934/2213/5058/5580
up-regulated	PDAC	Cycling-T	hsa04640	Hematopoietic cell lineage	10/232	99/8087	0.000517706	0.00957757	0.00813539	1436/929/913/911/912/2209/909/945/290/1441
up-regulated	PDAC	Cycling-T	hsa04145	Phagosome	12/232	152/8087	0.00137234	0.0236957	0.0201276	2212/929/1536/718/7099/7097/4973/2209/64581/4481/2213/9902
up-regulated	PDAC	Cycling-T	hsa05140	Leishmaniasis	8/232	77/8087	0.00155449	0.0251633	0.0213742	2212/1536/718/3460/7099/5743/7097/2209
up-regulated	PDAC	Cycling-T	hsa04371	Apelin signaling pathway	11/232	137/8087	0.00188558	0.0287274	0.0244016	6546/4208/4854/595/2776/2791/182/999/2771/1958/3709
up-regulated	PDAC	Cycling-T	hsa05142	Chagas disease	9/232	102/8087	0.00254336	0.0365961	0.0310855	713/714/712/718/3460/7099/7097/2776/2771
up-regulated	PDAC	Cycling-T	hsa04064	NF-kappa B signaling pathway	9/232	104/8087	0.002904	0.0372052	0.0316029	929/4055/7099/4067/5743/6850/5328/695/2920
up-regulated	PDAC	Cycling-T	hsa04625	C-type lectin receptor signaling pathway	9/232	104/8087	0.002904	0.0372052	0.0316029	5743/6850/2207/114548/6714/64581/5058/5580/3709
up-regulated	PDAC	Cycling-T	hsa04613	Neutrophil extracellular trap formation	13/232	190/8087	0.00316638	0.0372052	0.0316029	2212/2357/1536/718/7099/6850/27180/7097/2209/2359/6714/64581/51284
up-regulated	PDAC	Cycling-T	hsa04928	Parathyroid hormone synthesis, secretion and action	9/232	106/8087	0.00330394	0.0372052	0.0316029	4208/4323/9935/2776/4041/2771/9586/1958/3709
up-regulated	PDAC	DC-CD1C-cDC2	hsa04512	ECM-receptor interaction	15/208	88/8087	5.21779e-09	1.34619e-06	1.27424e-06	3691/6382/3915/3911/3913/1292/1293/375790/1284/3685/1278/1291/3912/1277/6385
up-regulated	PDAC	DC-CD1C-cDC2	hsa04510	Focal adhesion	20/208	201/8087	1.92955e-07	2.48912e-05	2.35608e-05	3691/3915/858/3911/3913/1292/1293/5159/1284/3685/1278/1291/9564/5880/3912/1277/857/5154/2064/80310
up-regulated	PDAC	DC-CD1C-cDC2	hsa04151	PI3K-Akt signaling pathway	24/208	354/8087	1.21602e-05	0.00104577	0.00098988	3691/2065/55970/3667/374/3915/3911/3913/1292/1293/9223/5159/1284/3685/1942/1278/1291/3912/1277/1969/5154/2064/80310/5562
up-regulated	PDAC	DC-CD1C-cDC2	hsa05418	Fluid shear stress and atherosclerosis	13/208	139/8087	5.56478e-05	0.00358928	0.00339744	6382/4313/858/445/1728/2947/3685/5880/6347/6385/857/5154/5562
up-regulated	PDAC	DC-CD1C-cDC2	hsa05205	Proteoglycans in cancer	14/208	205/8087	0.000797122	0.0411315	0.0389331	2065/6382/1634/4313/858/2017/3685/1278/7078/1277/3710/6385/857/2064
up-regulated	PDAC	DC-CD1C-cDC2	hsa05146	Amoebiasis	9/208	102/8087	0.00119875	0.0473557	0.0448246	1281/3915/3911/3913/1284/1278/3912/1277/929
up-regulated	PDAC	DC-CD1C-cDC2	hsa04974	Protein digestion and absorption	9/208	103/8087	0.00128484	0.0473557	0.0448246	1281/5646/1292/1293/1284/1278/1291/1277/8645
up-regulated	PDAC	DC-CD1C-cDC2	hsa04610	Complement and coagulation cascades	8/208	85/8087	0.00147429	0.0475459	0.0450046	714/3426/7035/4179/10544/718/1191/715
up-regulated	PDAC	Macrophage-C1QC-PLTP	hsa04928	Parathyroid hormone synthesis, secretion and action	13/196	106/8087	1.47405e-06	0.000375882	0.000299464	3727/5144/5143/3710/5594/1386/4209/5142/4041/4929/3708/2778/5567
up-regulated	PDAC	Macrophage-C1QC-PLTP	hsa04371	Apelin signaling pathway	12/196	137/8087	0.000115132	0.0146793	0.0116949	999/4854/3710/23710/2791/5594/4209/5140/23533/5581/3708/5567
up-regulated	PDAC	Macrophage-C1QC-PLTP	hsa05205	Proteoglycans in cancer	14/196	205/8087	0.000440534	0.0350541	0.0279275	7474/3339/7078/2316/960/5295/6382/3710/4193/5594/2065/8826/3708/5567
up-regulated	PDAC	Macrophage-C1QC-PLTP	hsa04935	Growth hormone synthesis, secretion and action	10/196	119/8087	0.00059706	0.0350541	0.0279275	3486/8660/5295/3710/3726/5594/1386/3708/2778/5567
up-regulated	PDAC	Macrophage-C1QC-PLTP	hsa04022	cGMP-PKG signaling pathway	12/196	167/8087	0.000720436	0.0350541	0.0279275	5997/493/8660/3710/5594/1386/4209/489/5140/23533/5581/3708
up-regulated	PDAC	Macrophage-C1QC-PLTP	hsa04611	Platelet activation	10/196	124/8087	0.000824803	0.0350541	0.0279275	5295/3710/5594/1281/6786/7094/23533/3708/2778/5567
up-regulated	PDAC	Plasma	hsa04512	ECM-receptor interaction	15/156	88/8087	9.14074e-11	2.0201e-08	1.73193e-08	375790/1291/1284/3913/3675/3693/6385/1277/3673/3339/3691/3914/1278/1293/1292
up-regulated	PDAC	Plasma	hsa04610	Complement and coagulation cascades	14/156	85/8087	6.41608e-10	7.08977e-08	6.07839e-08	2152/3075/718/3426/716/1191/710/2/7035/5627/5328/5054/5265/3687
up-regulated	PDAC	Plasma	hsa04510	Focal adhesion	20/156	201/8087	1.36911e-09	1.00858e-07	8.64702e-08	1291/1284/3913/3675/3693/1277/3673/3691/3914/1278/1293/595/10398/87/5159/10298/5155/4638/1292/9564
up-regulated	PDAC	Plasma	hsa04974	Protein digestion and absorption	12/156	103/8087	5.85356e-07	3.23409e-05	2.77274e-05	1291/1284/5646/1281/1277/80781/1278/1293/481/8645/1292/50509
up-regulated	PDAC	Plasma	hsa04151	PI3K-Akt signaling pathway	20/156	354/8087	1.39261e-05	0.000615535	0.000527727	2065/1291/1284/3913/3675/3693/1277/3673/3691/3566/3914/1278/1293/595/5159/2791/5155/7039/1292/10161
up-regulated	PDAC	Plasma	hsa04810	Regulation of actin cytoskeleton	15/156	218/8087	1.85561e-05	0.000659112	0.000565088	3675/3693/55740/3673/3691/10398/87/5159/10298/5155/4638/8396/6387/3687/9564
up-regulated	PDAC	Plasma	hsa04933	AGE-RAGE signaling pathway in diabetic complications	10/156	100/8087	2.08769e-05	0.000659112	0.000565088	2152/1284/1281/1277/1278/595/4088/6347/5054/5330
up-regulated	PDAC	Plasma	hsa05165	Human papillomavirus infection	18/156	331/8087	6.38869e-05	0.00176488	0.00151311	4854/1291/1284/3913/3675/3693/1277/3673/3691/3914/1278/1293/595/57801/5159/7132/1292/83439
up-regulated	PDAC	Plasma	hsa05146	Amoebiasis	9/156	102/8087	0.000145563	0.00357439	0.00306449	1284/3913/1281/1277/3914/1278/87/5330/2919
up-regulated	PDAC	Plasma	hsa05205	Proteoglycans in cancer	12/156	205/8087	0.000584151	0.0129097	0.0110681	2065/1634/3693/7078/6385/1277/3673/3339/1278/595/5328/6383
up-regulated	PDAC	Plasma	hsa04371	Apelin signaling pathway	9/156	137/8087	0.00128442	0.0236548	0.0202804	4854/999/59/595/4088/2791/4638/5054/5330
down-regulated	Breast	B-memory	hsa03040	Spliceosome	13/168	151/8087	1.40593e-05	0.00352889	0.00352889	3190/6632/9939/6629/22985/55696/51639/22827/6628/57461/6635/10569/11338
down-regulated	Breast	CD4-CCR7-FOS	hsa05012	Parkinson disease	15/77	249/8087	8.92594e-09	1.67808e-06	1.48452e-06	1349/54539/4697/7332/5705/1329/5719/4728/6389/10476/5335/203068/9167/5689/805
down-regulated	Breast	CD4-CCR7-FOS	hsa05022	Pathways of neurodegeneration - multiple diseases	19/77	475/8087	5.98586e-08	5.62671e-06	4.97771e-06	1349/54539/4697/7332/5705/355/1329/5719/4728/6389/10476/5335/203068/9167/7415/5689/805/79139/11258
down-regulated	Breast	CD4-CCR7-FOS	hsa05014	Amyotrophic lateral sclerosis	16/77	364/8087	2.25958e-07	1.41601e-05	1.25268e-05	1349/54539/4697/5705/1329/5719/4728/6389/10476/203068/9167/3181/7415/5689/79139/11258
down-regulated	Breast	CD4-CCR7-FOS	hsa00190	Oxidative phosphorylation	10/77	133/8087	4.43795e-07	2.08584e-05	1.84525e-05	1349/54539/4697/8992/1329/533/4728/6389/10476/9167
down-regulated	Breast	CD4-CCR7-FOS	hsa05016	Huntington disease	13/77	306/8087	5.23666e-06	0.000196899	0.000174188	1349/54539/4697/5705/1329/5719/4728/6389/10476/203068/9167/5689/11258
down-regulated	Breast	CD4-CCR7-FOS	hsa05010	Alzheimer disease	14/77	369/8087	8.07208e-06	0.000239439	0.000211822	1349/54539/4697/5705/355/1329/5719/4728/6389/10476/203068/9167/5689/805
down-regulated	Breast	CD4-CCR7-FOS	hsa05020	Prion disease	12/77	273/8087	8.91528e-06	0.000239439	0.000211822	1349/54539/4697/5705/1329/5719/4728/6389/10476/203068/9167/5689
down-regulated	Breast	CD4-CCR7-FOS	hsa04932	Non-alcoholic fatty liver disease	8/77	150/8087	8.28577e-05	0.00194715	0.00172257	1349/54539/4697/355/1329/4728/6389/9167
down-regulated	Breast	CD4-CCR7-FOS	hsa04714	Thermogenesis	9/77	231/8087	0.000322228	0.00600163	0.00530939	1349/54539/4697/6009/1329/4728/6389/10476/9167
down-regulated	Breast	CD4-CXCL13-Tfh	hsa04141	Protein processing in endoplasmic reticulum	17/250	171/8087	1.99465e-05	0.00300314	0.0027096	6748/7095/3326/3320/9709/7323/811/4780/573/6745/9978/7494/51035/258010/3703/23480/3303
down-regulated	Breast	CD4-CXCL13-Tfh	hsa05012	Parkinson disease	21/250	249/8087	2.68577e-05	0.00300314	0.0027096	4694/203068/515/5719/4711/4697/4726/7277/7386/10383/4780/5692/7494/5709/4729/4722/7417/7332/6390/4731/4713
down-regulated	Breast	CD4-CXCL13-Tfh	hsa05020	Prion disease	22/250	273/8087	3.47854e-05	0.00300314	0.0027096	4694/203068/515/5719/4711/4697/4726/7277/7386/10383/1457/5692/5709/4729/4722/857/7417/6390/4731/4713/572/3303
down-regulated	Breast	CD4-CXCL13-Tfh	hsa00190	Oxidative phosphorylation	14/250	133/8087	5.81556e-05	0.00301246	0.00271801	4694/515/4711/4697/4726/7386/8992/4729/4722/10063/6390/4731/4713/528
down-regulated	Breast	CD4-CXCL13-Tfh	hsa03010	Ribosome	15/250	158/8087	0.000104837	0.00452548	0.00408314	6155/6201/4736/51081/6175/6124/6168/6206/6161/6130/6228/6125/63931/6142/6234
down-regulated	Breast	CD4-CXCL13-Tfh	hsa05016	Huntington disease	22/250	306/8087	0.00018881	0.00657985	0.00593671	4694/203068/515/5719/4711/4697/4726/7277/7386/10383/5692/29982/5709/4729/4722/7417/6390/5431/4731/5437/1211/4713
down-regulated	Breast	CD4-CXCL13-Tfh	hsa04932	Non-alcoholic fatty liver disease	14/250	150/8087	0.000213226	0.00657985	0.00593671	4694/998/4711/4697/4726/7386/6945/7494/4729/4722/6390/4731/51094/4713
down-regulated	Breast	CD4-CXCL13-Tfh	hsa03040	Spliceosome	14/250	151/8087	0.000228643	0.00657985	0.00593671	6636/57819/6430/9775/6635/51503/8683/9410/55119/84950/8896/6632/23350/3303
down-regulated	Breast	CD4-CXCL13-Tfh	hsa05010	Alzheimer disease	24/250	369/8087	0.000434211	0.0112461	0.0101468	4694/203068/515/5719/4711/4697/4726/7277/7386/10383/1457/5692/29982/7494/5709/4729/4722/1856/7417/6390/4731/4713/572/5604
down-regulated	Breast	CD4-CXCL13-Tfh	hsa05014	Amyotrophic lateral sclerosis	23/250	364/8087	0.000853003	0.0200843	0.0181212	4694/203068/515/5719/4711/4697/4726/7277/7386/10383/5692/29982/8878/7494/5709/4729/5903/4722/10010/6390/4731/4713/572
down-regulated	Breast	CD4-CXCL13-Tfh	hsa01200	Carbon metabolism	11/250	118/8087	0.00101931	0.022	0.0198497	2821/5223/5162/7086/1892/2023/2805/2746/6390/5226/6888
down-regulated	Breast	CD4-CXCL13-Tfh	hsa05211	Renal cell carcinoma	8/250	69/8087	0.00122103	0.0243267	0.0219489	998/5906/8453/3091/5781/9978/572/5604
down-regulated	Breast	CD4-CXCL13-Tfh	hsa05022	Pathways of neurodegeneration - multiple diseases	27/250	475/8087	0.00152065	0.028132	0.0253823	4694/203068/515/5719/4711/4697/4726/7277/7386/10383/1457/5692/29982/8878/7494/5709/4729/4722/1856/7417/7332/10010/6390/4731/4713/572/5604
down-regulated	Breast	CD4-CXCL13-Tfh	hsa03018	RNA degradation	8/250	79/8087	0.00292391	0.0473307	0.0427044	57819/3329/29883/22894/51013/10438/2023/80349
down-regulated	Breast	CD8-CCR7	hsa00190	Oxidative phosphorylation	11/87	133/8087	1.52037e-07	2.61504e-05	2.17653e-05	7381/4697/514/9167/1327/518/4725/9550/533/506/5464
down-regulated	Breast	CD8-CCR7	hsa05014	Amyotrophic lateral sclerosis	15/87	364/8087	6.42911e-06	0.000552904	0.000460189	7381/54205/4697/5688/6647/514/5685/9167/1327/2876/518/60/4725/11337/506
down-regulated	Breast	CD8-CCR7	hsa05012	Parkinson disease	12/87	249/8087	1.27086e-05	0.000616937	0.000513485	7381/11315/54205/4697/5688/514/5685/9167/1327/518/4725/506
down-regulated	Breast	CD8-CCR7	hsa05016	Huntington disease	13/87	306/8087	2.07463e-05	0.000713673	0.000594	7381/54205/4697/5688/6647/514/5685/9167/1327/2876/518/4725/506
down-regulated	Breast	CD8-CCR7	hsa05020	Prion disease	12/87	273/8087	3.18512e-05	0.000913068	0.000759959	7381/54205/4697/5688/6647/514/5685/9167/1327/518/4725/506
down-regulated	Breast	CD8-CCR7	hsa05022	Pathways of neurodegeneration - multiple diseases	15/87	475/8087	0.00014279	0.00350856	0.00292022	7381/11315/54205/4697/5688/6647/514/5685/9167/1327/2876/518/4725/11337/506
down-regulated	Breast	CD8-CCR7	hsa04932	Non-alcoholic fatty liver disease	8/87	150/8087	0.000196825	0.00376154	0.00313078	7381/54205/4697/998/9167/1327/4725/3570
down-regulated	Breast	CD8-CCR7	hsa05130	Pathogenic Escherichia coli infection	9/87	197/8087	0.000250029	0.0043005	0.00357936	10092/10096/54205/7009/998/2597/60/81873/10093
down-regulated	Breast	CD8-CCR7	hsa05132	Salmonella infection	10/87	249/8087	0.000317963	0.00497179	0.00413808	10092/10096/54205/3326/998/2597/60/81873/3320/10093
down-regulated	Breast	CD8-CCR7	hsa05010	Alzheimer disease	12/87	369/8087	0.00054553	0.00781926	0.00650808	7381/54205/4697/5688/514/5685/9167/1327/518/2597/4725/506
down-regulated	Breast	CD8-CCR7	hsa04714	Thermogenesis	9/87	231/8087	0.00080029	0.00983213	0.00818342	7381/4697/514/9167/1327/518/60/4725/506
down-regulated	Breast	CD8-CCR7	hsa05131	Shigellosis	9/87	246/8087	0.00124873	0.0143188	0.0119177	10092/10096/54205/998/60/81873/11337/10093/87
down-regulated	Breast	CD8-GZMK-FOS	hsa03010	Ribosome	48/244	158/8087	5.5001e-36	1.35303e-33	1.13476e-33	6128/3921/6142/6170/6144/6193/11224/6141/6165/6135/6139/6205/6130/6201/6202/6164/6168/6167/6156/6132/6169/6134/6173/55052/6160/6158/6222/6233/6223/6191/6227/6217/6188/6208/6210/6147/6157/6155/6138/7311/6206/6124/124995/6152/6181/6143/6176/6203
down-regulated	Breast	CD8-GZMK-FOS	hsa05171	Coronavirus disease - COVID-19	50/244	232/8087	1.26927e-29	1.56121e-27	1.30936e-27	6128/3921/6142/6170/6144/6193/11224/6774/6141/6165/6135/6139/6205/6130/6201/6202/6164/6168/6167/6156/6132/6169/6134/6173/6160/6158/6222/103/6233/6223/6191/6227/6217/6188/6208/6210/6147/6157/6155/6138/7311/6206/6124/5293/6152/6181/3661/6143/6176/6203
down-regulated	Breast	CD8-GZMK-FOS	hsa05012	Parkinson disease	40/244	249/8087	9.01957e-19	7.39605e-17	6.20293e-17	7314/11315/1350/514/805/10376/292/7846/4716/4697/27089/4708/5567/7295/498/9246/515/5688/10476/7388/506/6233/5684/5692/7417/5685/6391/374291/1347/4700/4696/4725/29796/7311/5689/509/7316/5690/1349/7327
down-regulated	Breast	CD8-GZMK-FOS	hsa05020	Prion disease	36/244	273/8087	3.5491e-14	2.18269e-12	1.83059e-12	1350/514/10376/292/7846/1535/4716/4697/27089/4708/5567/498/515/5880/5688/10476/7388/506/5684/5692/7417/5685/6391/374291/1347/4700/4696/5879/4725/29796/5533/5689/509/5293/5690/1349
down-regulated	Breast	CD8-GZMK-FOS	hsa05022	Pathways of neurodegeneration - multiple diseases	44/244	475/8087	1.25739e-11	6.18638e-10	5.18841e-10	7314/11315/1350/514/805/10376/292/7846/4716/4697/27089/4708/11337/498/9246/515/5688/10133/10476/7388/506/6233/5684/5692/7417/5685/6391/374291/1347/4700/4696/5879/4725/29796/7311/5533/5689/509/1499/7316/5690/5894/1349/7327
down-regulated	Breast	CD8-GZMK-FOS	hsa05010	Alzheimer disease	36/244	369/8087	2.82895e-10	1.15987e-08	9.72761e-09	1350/514/805/10376/292/7846/4716/4697/27089/4708/498/515/5688/10476/7388/506/5684/5692/7417/5685/6391/374291/57142/1347/4700/4696/4725/29796/5533/5689/509/5293/1499/5690/5894/1349
down-regulated	Breast	CD8-GZMK-FOS	hsa00190	Oxidative phosphorylation	21/244	133/8087	3.64553e-10	1.28114e-08	1.07447e-08	1350/514/4716/4697/27089/4708/498/515/10476/7388/506/6391/374291/1347/4700/4696/4725/29796/509/521/1349
down-regulated	Breast	CD8-GZMK-FOS	hsa05016	Huntington disease	32/244	306/8087	5.34354e-10	1.64314e-08	1.37807e-08	1350/514/10376/292/7846/4716/4697/27089/4708/498/515/5688/10476/7388/506/5684/5692/7417/5685/6391/374291/5431/1347/4700/4696/4725/29796/5689/509/5690/1173/1349
down-regulated	Breast	CD8-GZMK-FOS	hsa05014	Amyotrophic lateral sclerosis	35/244	364/8087	7.66243e-10	2.0944e-08	1.75653e-08	1350/6432/514/10376/7846/4716/4697/27089/4708/11337/498/515/310/5688/10133/10476/7388/506/5684/5692/5685/6391/374291/1347/4700/4696/5879/4725/29796/5533/5689/220988/509/5690/1349
down-regulated	Breast	CD8-GZMK-FOS	hsa04714	Thermogenesis	23/244	231/8087	4.14985e-07	1.02086e-05	8.5618e-06	1350/514/4716/4697/27089/4708/5567/498/515/10476/7388/506/6391/374291/1347/4700/4696/4725/29796/509/521/84987/1349
down-regulated	Breast	CD8-GZMK-FOS	hsa04932	Non-alcoholic fatty liver disease	17/244	150/8087	2.44859e-06	5.47594e-05	4.59257e-05	1350/4716/4697/998/27089/4708/7388/6391/374291/1347/4700/4696/5879/4725/29796/5293/1349
down-regulated	Breast	CD8-GZMK-FOS	hsa05132	Salmonella infection	21/244	249/8087	1.8618e-05	0.000381669	0.000320099	10094/3320/5788/391/10376/7846/998/10627/8655/7295/81873/6188/7879/10109/5879/55845/330/5293/1499/5894/9267
down-regulated	Breast	CD8-GZMK-FOS	hsa04660	T cell receptor signaling pathway	12/244	104/8087	6.40532e-05	0.00121208	0.00101655	5788/998/915/3458/5777/4773/10125/5533/5293/9402/868/5894
down-regulated	Breast	CD8-GZMK-FOS	hsa05167	Kaposi sarcoma-associated herpesvirus infection	16/244	193/8087	0.00022956	0.00403371	0.003383	7314/805/6774/11337/3459/6233/4773/5879/7311/5533/5293/1499/7316/3661/5894/57580
down-regulated	Breast	CD8-GZMK-FOS	hsa05235	PD-L1 expression and PD-1 checkpoint pathway in cancer	10/244	89/8087	0.000325757	0.00534241	0.00448058	6774/3459/915/3458/5777/4773/10125/5533/5293/5894
down-regulated	Breast	CD8-GZMK-FOS	hsa04370	VEGF signaling pathway	8/244	59/8087	0.000358754	0.00551585	0.00462604	998/5880/3315/4773/5879/5533/5293/5894
down-regulated	Breast	CD8-GZMK-FOS	hsa04666	Fc gamma R-mediated phagocytosis	10/244	97/8087	0.000652599	0.00891885	0.00748008	10094/5788/998/81873/5880/10109/5879/274/5293/5894
down-regulated	Breast	CD8-GZMK-FOS	hsa05135	Yersinia infection	12/244	137/8087	0.000855631	0.0110782	0.00929106	10094/391/998/6093/81873/5880/4773/10109/5879/5293/3661/8935
down-regulated	Breast	CD8-GZMK-FOS	hsa04137	Mitophagy - animal	8/244	68/8087	0.000947137	0.0116498	0.00977047	7314/11337/10133/54543/6233/7879/7311/7316
down-regulated	Breast	CD8-GZMK-FOS	hsa05203	Viral carcinogenesis	15/244	204/8087	0.00125604	0.0147136	0.01234	7534/6774/1654/998/7531/5567/5966/6672/5922/894/5879/5902/5293/3661/3516
down-regulated	Breast	CD8-GZMK-FOS	hsa05100	Bacterial invasion of epithelial cells	8/244	77/8087	0.00213679	0.0238931	0.0200387	10094/391/998/81873/10109/5879/5293/1499
down-regulated	Breast	CD8-GZMK-FOS	hsa04217	Necroptosis	12/244	159/8087	0.00305955	0.0313276	0.0262739	3320/8837/6774/292/3459/3146/3458/7417/29082/142/6775/330
down-regulated	Breast	CD8-GZMK-FOS	hsa05131	Shigellosis	16/244	246/8087	0.00309169	0.0313276	0.0262739	7314/10094/831/998/10627/6093/11337/81873/6233/10109/5879/7311/5293/7316/3661/9267
down-regulated	Breast	CD8-GZMK-FOS	hsa05163	Human cytomegalovirus infection	15/244	225/8087	0.00327477	0.0313276	0.0262739	805/6774/2923/6093/5567/5880/5734/4773/5879/5533/567/5293/1499/3661/5894
down-regulated	Breast	CD8-GZMK-FOS	hsa04120	Ubiquitin mediated proteolysis	11/244	140/8087	0.00331105	0.0313276	0.0262739	7314/7329/9246/6233/51529/7311/330/7316/868/8925/7327
down-regulated	Breast	CD8-GZMK-FOS	hsa05017	Spinocerebellar ataxia	11/244	143/8087	0.00389701	0.0355061	0.0297783	292/5688/5684/5692/7417/5685/5689/5293/5690/10528/3516
down-regulated	Breast	CD8-GZMK-FOS	hsa04141	Protein processing in endoplasmic reticulum	12/244	171/8087	0.00550013	0.0483226	0.0405273	3320/23471/6748/10960/2923/23190/10130/10956/7095/6745/6185/7327
down-regulated	Breast	CD8-HSPA1A	hsa05016	Huntington disease	38/289	306/8087	1.02145e-11	2.71706e-09	2.34396e-09	54205/1327/517/7417/5439/11258/1345/7381/10476/1175/513/4716/4694/2876/5691/5689/4696/841/10376/1211/6648/5684/3799/55967/1329/4711/522/4706/26100/498/25942/5702/4707/5438/1213/29796/7384/5432
down-regulated	Breast	CD8-HSPA1A	hsa05012	Parkinson disease	33/289	249/8087	4.56891e-11	6.07665e-09	5.24222e-09	54205/7314/805/1327/517/7417/11315/1345/7381/10476/513/4716/4694/2771/5691/5689/4696/7311/10376/5684/3799/7295/55967/1329/4711/522/4706/498/5702/4707/6233/29796/7384
down-regulated	Breast	CD8-HSPA1A	hsa03040	Spliceosome	25/289	151/8087	9.81338e-11	8.7012e-09	7.50638e-09	3192/6434/3178/6632/2521/6625/6426/8683/6636/51729/6637/6427/22827/27316/9879/22916/6431/4670/11017/6429/6633/58517/6634/1659/9775
down-regulated	Breast	CD8-HSPA1A	hsa05014	Amyotrophic lateral sclerosis	38/289	364/8087	1.76208e-09	1.17178e-07	1.01088e-07	54205/1327/517/3178/11258/1345/60/2521/11345/7381/10476/513/4716/4694/2876/5691/5689/11337/4696/5861/10376/5684/3799/55967/1329/4711/4218/522/4706/26100/498/71/400916/5702/7415/4707/29796/7384
down-regulated	Breast	CD8-HSPA1A	hsa05022	Pathways of neurodegeneration - multiple diseases	44/289	475/8087	3.603e-09	1.9168e-07	1.65359e-07	54205/7314/805/1327/517/7417/11315/11258/1345/2521/11345/7381/10476/513/4716/4694/1452/2876/5691/5689/11337/4696/841/7311/5861/10376/1499/5684/3799/55967/1329/4711/4218/522/4706/26100/498/5702/7415/3845/4707/6233/29796/7384
down-regulated	Breast	CD8-HSPA1A	hsa04141	Protein processing in endoplasmic reticulum	24/289	171/8087	7.42898e-09	3.02158e-07	2.60666e-07	10952/7322/11231/10961/51035/5034/51128/64215/6745/7095/9709/6184/7184/6747/23471/1603/56681/7415/10294/6746/10905/10130/573/54431
down-regulated	Breast	CD8-HSPA1A	hsa00190	Oxidative phosphorylation	21/289	133/8087	7.95152e-09	3.02158e-07	2.60666e-07	10632/1327/517/1345/7381/10476/513/4716/4694/4696/55967/1329/4711/522/4706/498/4707/9296/29796/523/7384
down-regulated	Breast	CD8-HSPA1A	hsa05020	Prion disease	29/289	273/8087	1.18466e-07	3.939e-06	3.39811e-06	54205/1327/517/7417/1345/7381/10476/513/4716/5295/4694/5691/5689/4696/10376/10963/5684/3799/55967/1329/4711/1535/522/4706/498/5702/4707/29796/7384
down-regulated	Breast	CD8-HSPA1A	hsa04714	Thermogenesis	25/289	231/8087	6.51254e-07	1.92482e-05	1.66051e-05	10632/1327/517/1345/60/7381/10476/513/4716/4694/4696/55967/1329/4711/522/4706/498/71/3845/4707/6601/29796/57492/5571/7384
down-regulated	Breast	CD8-HSPA1A	hsa03010	Ribosome	20/289	158/8087	7.64955e-07	2.03478e-05	1.75537e-05	6139/6146/6202/6134/6128/51065/6154/7311/6167/6223/6164/6206/6124/51021/6137/6233/124995/2197/6132/6159
down-regulated	Breast	CD8-HSPA1A	hsa05010	Alzheimer disease	33/289	369/8087	8.88576e-07	2.14874e-05	1.85368e-05	54205/805/1327/517/7417/1345/7381/10476/513/4716/5295/4694/1452/5691/5689/4696/841/10376/1499/5684/3799/55967/1329/4711/522/4706/26100/498/5702/3845/4707/29796/7384
down-regulated	Breast	CD8-HSPA1A	hsa05100	Bacterial invasion of epithelial cells	13/289	77/8087	2.78811e-06	6.18031e-05	5.33165e-05	10096/10094/60/10093/5295/3059/1211/1499/71/10109/1213/1398/10552
down-regulated	Breast	CD8-HSPA1A	hsa05131	Shigellosis	23/289	246/8087	2.16256e-05	0.000442369	0.000381624	54205/7314/11335/10096/10094/375/60/10627/7322/11345/10093/5295/3059/11337/7311/26100/71/81858/10109/6233/6093/1398/10552
down-regulated	Breast	CD8-HSPA1A	hsa04932	Non-alcoholic fatty liver disease	17/289	150/8087	2.32826e-05	0.000442369	0.000381624	54205/1327/1345/7381/4716/5295/4694/4696/841/55967/1329/4711/4706/4707/29796/5571/7384
down-regulated	Breast	CD8-HSPA1A	hsa05134	Legionellosis	9/289	57/8087	0.000166916	0.00295998	0.00255352	54205/375/841/5861/51128/3297/56681/7415/3689
down-regulated	Breast	CD8-HSPA1A	hsa03050	Proteasome	8/289	46/8087	0.000192871	0.00320649	0.00276618	5698/51371/5691/5689/9491/5696/5684/5702
down-regulated	Breast	CD8-HSPA1A	hsa05171	Coronavirus disease - COVID-19	20/289	232/8087	0.000228584	0.00357666	0.00308552	6139/6146/6202/5295/6134/6128/51065/6154/7311/6167/6223/6164/6206/6124/6137/6233/2197/6132/6159/103
down-regulated	Breast	CD8-HSPA1A	hsa04137	Mitophagy - animal	9/289	68/8087	0.000648392	0.0095818	0.00826605	7314/11345/665/11337/7311/4077/3845/6233/9958
down-regulated	Breast	CD8-HSPA1A	hsa04530	Tight junction	15/289	169/8087	0.00102346	0.0143285	0.0123609	10096/10094/4637/60/10627/10093/3059/9368/10376/4218/71/10109/6093/5571/10552
down-regulated	Breast	CD8-HSPA1A	hsa05416	Viral myocarditis	8/289	60/8087	0.00122672	0.0155385	0.0134048	54205/60/841/959/71/1604/3689/1982
down-regulated	Breast	CD8-HSPA1A	hsa05132	Salmonella infection	19/289	249/8087	0.00145149	0.0175499	0.01514	54205/10096/10094/11258/375/60/10627/10093/841/10376/1499/5878/3799/7295/7184/71/10109/8655/10552
down-regulated	Breast	CD8-HSPA1A	hsa05130	Pathogenic Escherichia coli infection	16/289	197/8087	0.00179999	0.0208173	0.0179588	54205/10096/10094/375/60/10093/3059/5777/9368/841/5861/10376/71/10109/6093/10552
down-regulated	Breast	CD8-HSPA1A	hsa03015	mRNA surveillance pathway	10/289	97/8087	0.00234288	0.0259669	0.0224012	26986/5500/2521/22916/23293/55339/8761/5499/9775/23049
down-regulated	Breast	CD8-HSPA1A	hsa04140	Autophagy - animal	12/289	137/8087	0.00356511	0.0364739	0.0314654	3146/11345/5295/3920/81671/11337/5861/8673/4218/26100/3845/64422
down-regulated	Breast	CD8-HSPA1A	hsa04260	Cardiac muscle contraction	9/289	87/8087	0.00373897	0.0368357	0.0317776	1327/1345/7381/7170/1329/7171/483/29796/7384
down-regulated	Breast	CD8-HSPA1A	hsa04144	Endocytosis	18/289	252/8087	0.00393131	0.0373474	0.032219	10096/10094/51160/64744/375/1175/10093/84364/868/1211/5878/3799/4218/51699/10109/1213/9744/10552
down-regulated	Breast	CD8-HSPA1A	hsa04611	Platelet activation	11/289	124/8087	0.00470539	0.0431598	0.0372332	5500/60/10627/5295/2771/5908/8673/71/6093/5499/4067
down-regulated	Breast	Cycling-T	hsa04110	Cell cycle	12/137	124/8087	1.08792e-06	0.000230638	0.000216438	701/7272/8318/990/9134/1111/1027/1017/898/991/10735/5925
down-regulated	Breast	Macrophage-IL1B	hsa05134	Legionellosis	8/132	57/8087	3.43681e-06	0.000577397	0.000511398	3576/3553/4671/58484/2919/3684/7099/1378
down-regulated	Breast	Macrophage-IL1B	hsa05171	Coronavirus disease - COVID-19	15/132	232/8087	5.0872e-06	0.000577397	0.000511398	7311/3576/6130/6165/1675/6232/6159/3553/6122/6234/6170/6176/7099/3572/3921
down-regulated	Breast	Macrophage-IL1B	hsa05323	Rheumatoid arthritis	9/132	93/8087	1.88999e-05	0.00143009	0.00126663	3552/6364/3576/6349/3553/6348/6352/2919/7099
down-regulated	Breast	Macrophage-IL1B	hsa04061	Viral protein interaction with cytokine and cytokine receptor	9/132	100/8087	3.39498e-05	0.00167747	0.00148573	6364/3576/3561/6349/6351/6348/6352/2919/3572
down-regulated	Breast	Macrophage-IL1B	hsa04621	NOD-like receptor signaling pathway	12/132	181/8087	3.69487e-05	0.00167747	0.00148573	3576/3553/4671/58484/3326/6352/2919/7099/23236/4210/7295/5027
down-regulated	Breast	Macrophage-IL1B	hsa03010	Ribosome	10/132	158/8087	0.00024634	0.00931986	0.00825455	7311/6130/6165/6232/6159/6122/6234/6170/6176/3921
down-regulated	Breast	Macrophage-IL1B	hsa04060	Cytokine-cytokine receptor interaction	14/132	295/8087	0.000308006	0.00998821	0.0088465	3552/6364/3576/3561/6349/3624/6351/8808/3553/6348/3557/6352/2919/3572
down-regulated	Breast	Macrophage-IL1B	hsa05131	Shigellosis	12/132	246/8087	0.000659666	0.018718	0.0165784	7311/3576/10627/3553/5216/87/4671/58484/6352/7099/23236/3611
down-regulated	Breast	Macrophage-IL1B	hsa04062	Chemokine signaling pathway	10/132	192/8087	0.00114165	0.0219921	0.0194783	6364/3576/6349/6351/5908/6348/6352/2919/5880/23236
down-regulated	Breast	Macrophage-IL1B	hsa05132	Salmonella infection	11/132	249/8087	0.00244632	0.0321054	0.0284356	3576/6934/10627/3553/5216/4671/83547/58484/3326/7099/7295
down-regulated	Breast	Macrophage-IL1B	hsa05163	Human cytomegalovirus infection	10/132	225/8087	0.00367274	0.0438795	0.0388639	3576/6349/5743/6351/3553/6348/567/6352/5880/23236
down-regulated	Breast	Plasma	hsa05010	Alzheimer disease	34/260	369/8087	2.1698e-08	3.43051e-06	3.06624e-06	1351/1327/9167/801/4706/5710/5713/4717/4712/5693/292/515/22926/1452/3799/203068/9451/4698/81029/5709/26100/823/637/489/5701/4723/572/1537/2081/1965/3710/5685/5894/4700
down-regulated	Breast	Plasma	hsa05012	Parkinson disease	27/260	249/8087	2.40738e-08	3.43051e-06	3.06624e-06	1351/1327/9167/801/4706/5710/5713/4717/4712/5693/292/515/22926/3799/203068/9451/4698/5709/7326/5701/4723/1537/2081/1965/3710/5685/4700
down-regulated	Breast	Plasma	hsa05020	Prion disease	27/260	273/8087	1.65422e-07	1.57151e-05	1.40464e-05	1351/857/1327/9167/3304/4706/5710/5713/4717/4712/5693/292/515/3799/203068/9451/4698/5709/3303/5701/4723/572/1537/1965/3710/5685/4700
down-regulated	Breast	Plasma	hsa05014	Amyotrophic lateral sclerosis	31/260	364/8087	5.61772e-07	4.00262e-05	3.5776e-05	1351/1327/9167/4706/5710/71/5713/4717/4712/5693/515/22926/3799/203068/9451/4698/311/5709/283/26100/637/5701/4723/572/1537/2081/1965/7175/3710/5685/4700
down-regulated	Breast	Plasma	hsa05022	Pathways of neurodegeneration - multiple diseases	35/260	475/8087	3.02789e-06	0.00017259	0.000154263	1351/1327/9167/801/4706/5710/5713/4717/4712/5693/292/515/22926/1452/3799/203068/9451/4698/81029/5709/7326/26100/823/637/489/5701/4723/572/1537/2081/1965/3710/5685/5894/4700
down-regulated	Breast	Plasma	hsa00190	Oxidative phosphorylation	16/260	133/8087	5.04744e-06	0.000208425	0.000186293	1351/9551/1327/9167/4706/4717/4712/515/4698/537/521/4723/27068/1537/4700/535
down-regulated	Breast	Plasma	hsa05016	Huntington disease	26/260	306/8087	5.11921e-06	0.000208425	0.000186293	1351/1327/9167/1175/4706/5710/5440/5713/4717/4712/1173/5693/292/515/3799/203068/4698/5709/1211/26100/5701/4723/1537/2081/5685/4700
down-regulated	Breast	Plasma	hsa05160	Hepatitis C	16/260	157/8087	4.16853e-05	0.00148504	0.00132735	7534/23562/3716/3646/1026/975/9451/7529/4938/7297/637/572/1965/8554/6654/5894
down-regulated	Breast	Plasma	hsa04714	Thermogenesis	20/260	231/8087	5.04232e-05	0.00159674	0.00142718	1351/9551/1327/9167/4706/71/6009/4717/4712/515/4698/55744/25915/521/4723/1537/6654/11343/4700/137682
down-regulated	Breast	Plasma	hsa04142	Lysosome	14/260	128/8087	5.82771e-05	0.0016609	0.00148453	427/4074/1509/23062/1211/537/79158/4669/5660/410/9583/2717/2799/535
down-regulated	Breast	Plasma	hsa05169	Epstein-Barr virus infection	18/260	202/8087	8.31613e-05	0.00215463	0.00192584	3716/29760/3516/1026/9636/5710/1647/5713/6890/5709/4938/7297/637/960/9541/5701/6850/958
down-regulated	Breast	Plasma	hsa04932	Non-alcoholic fatty liver disease	14/260	150/8087	0.000319458	0.00758713	0.00678148	1351/1327/9167/4706/4717/4712/9451/4698/637/4723/1537/2081/1965/4700
down-regulated	Breast	Plasma	hsa04141	Protein processing in endoplasmic reticulum	15/260	171/8087	0.000385813	0.00845821	0.00756006	1603/3304/3301/22926/9451/6400/7326/823/7466/3303/6746/80267/51035/2081/1965
down-regulated	Breast	Plasma	hsa04144	Endocytosis	19/260	252/8087	0.000468962	0.00954673	0.008533	857/7456/3304/1175/10096/51160/10890/55737/1173/8395/3799/2060/1211/64744/57132/377/3303/51652/51028
down-regulated	Breast	Plasma	hsa05017	Spinocerebellar ataxia	12/260	143/8087	0.00213586	0.038045	0.0340051	3516/5710/5713/5693/292/5709/26100/489/5701/2081/3710/5685
down-regulated	Breast	Plasma	hsa03013	RNA transport	14/260	186/8087	0.00262742	0.0416008	0.0371833	6613/10921/3646/6612/26019/1979/5411/1207/7329/22985/8665/79760/1965/7175
down-regulated	Colon	Cycling-T	hsa05132	Salmonella infection	10/37	249/8087	1.07103e-07	1.3495e-05	9.8084e-06	10376/2597/60/5216/10383/71/203068/84790/929/3320
down-regulated	Colon	Cycling-T	hsa04145	Phagosome	8/37	152/8087	3.15074e-07	1.98496e-05	1.44271e-05	10376/60/10383/71/203068/2212/84790/929
down-regulated	Colon	Cycling-T	hsa05130	Pathogenic Escherichia coli infection	8/37	197/8087	2.26485e-06	9.51237e-05	6.91375e-05	10376/2597/60/10383/71/203068/2212/84790
down-regulated	Colon	Cycling-T	hsa05014	Amyotrophic lateral sclerosis	8/37	364/8087	0.000190954	0.00601506	0.00437184	10376/60/5216/10383/71/203068/3181/84790
down-regulated	Colon	DC-CD1C-cDC2	hsa05171	Coronavirus disease - COVID-19	20/103	232/8087	7.86843e-12	1.6209e-09	1.49086e-09	2162/6205/718/6229/6228/6207/6138/6154/6125/6203/6187/7311/51311/6189/6142/6159/2353/6193/6133/6136
down-regulated	Colon	DC-CD1C-cDC2	hsa03010	Ribosome	16/103	158/8087	1.09167e-10	1.12442e-08	1.03421e-08	6205/6229/6228/6207/6138/6154/6125/6203/6187/7311/6189/6142/6159/6193/6133/6136
down-regulated	Colon	DC-CD1C-cDC2	hsa04015	Rap1 signaling pathway	9/103	210/8087	0.00137366	0.0471624	0.0433788	60/999/57121/5155/2770/23683/805/9855/3684
down-regulated	Colon	Monocyte-VCAN	hsa05012	Parkinson disease	16/158	249/8087	2.65943e-05	0.00404189	0.003559	5714/5701/5695/1843/292/6622/522/4729/5685/1327/5702/581/5691/7388/10105/9377
down-regulated	Colon	Monocyte-VCAN	hsa05010	Alzheimer disease	20/158	369/8087	3.07368e-05	0.00404189	0.003559	3553/1536/5714/5701/5695/292/6622/522/6868/4729/5685/1327/102/5702/5691/5604/7388/10105/9377/2597
down-regulated	Colon	Monocyte-VCAN	hsa05020	Prion disease	16/158	273/8087	8.08293e-05	0.00612562	0.00539378	3553/1536/5714/5701/5695/292/522/4729/5685/1327/5702/581/5691/7388/10105/9377
down-regulated	Colon	Monocyte-VCAN	hsa05016	Huntington disease	17/158	306/8087	9.31652e-05	0.00612562	0.00539378	6507/5714/5701/5695/292/522/4729/6648/5685/1327/5702/581/5691/7388/10105/2876/9377
down-regulated	Colon	Monocyte-VCAN	hsa04142	Lysosome	9/158	128/8087	0.000867265	0.0264465	0.0232869	3074/54/1520/950/4668/2990/2717/1509/968
down-regulated	Colon	Monocyte-VCAN	hsa04380	Osteoclast differentiation	9/158	128/8087	0.000867265	0.0264465	0.0232869	3553/2214/1436/54/11006/695/2353/5604/3726
down-regulated	Colon	Monocyte-VCAN	hsa05022	Pathways of neurodegeneration - multiple diseases	20/158	475/8087	0.000905013	0.0264465	0.0232869	3553/1536/5714/5701/5695/292/6622/522/23710/4729/5685/1327/5702/581/5691/5604/7388/10105/2876/9377
down-regulated	Colon	Neutrophil	hsa04380	Osteoclast differentiation	8/75	128/8087	2.19394e-05	0.00288117	0.00265133	2215/140885/4689/11027/7132/8061/10326/2214
down-regulated	Liver	B-naive	hsa03010	Ribosome	22/46	158/8087	2.97233e-26	3.26956e-24	3.22263e-24	6167/51081/6161/6194/6156/6181/6233/6222/6152/6168/6176/6164/6207/6229/6187/6146/6154/6137/6227/11224/6134/6135
down-regulated	Liver	B-naive	hsa05171	Coronavirus disease - COVID-19	22/46	232/8087	1.85947e-22	1.02271e-20	1.00803e-20	6167/6161/6194/6156/6181/6233/6222/6152/6168/6176/6164/6207/6229/6187/6146/6154/6137/6227/11224/6134/1536/6135
down-regulated	Liver	Cycling-T	hsa04380	Osteoclast differentiation	14/90	128/8087	9.86026e-11	1.78471e-08	1.57764e-08	6688/7305/1436/2212/11006/3460/2213/140885/6850/54209/10288/695/2209/11027
down-regulated	Liver	Cycling-T	hsa04610	Complement and coagulation cascades	10/90	85/8087	2.76811e-08	2.50514e-06	2.21449e-06	713/714/11326/5265/5329/3684/7056/2/728/712
down-regulated	Liver	Cycling-T	hsa05150	Staphylococcus aureus infection	10/90	96/8087	9.03105e-08	5.44873e-06	4.81656e-06	2212/713/2357/2213/714/3684/2359/2209/728/712
down-regulated	Liver	Cycling-T	hsa04666	Fc gamma R-mediated phagocytosis	9/90	97/8087	1.11929e-06	5.0648e-05	4.47717e-05	4082/2212/2934/3055/2213/6850/2209/5580/4067
down-regulated	Liver	Cycling-T	hsa05152	Tuberculosis	11/90	180/8087	4.42013e-06	0.000160009	0.000141444	2212/3460/929/2213/972/6850/7099/7097/3684/1051/2209
down-regulated	Liver	Cycling-T	hsa04145	Phagosome	10/90	152/8087	6.45692e-06	0.000194784	0.000172185	1536/2212/929/2213/7099/7097/3684/2209/4481/9296
down-regulated	Liver	Cycling-T	hsa04640	Hematopoietic cell lineage	8/90	99/8087	1.28704e-05	0.000332791	0.00029418	1436/945/929/1441/909/911/3684/2209
down-regulated	Liver	Cycling-T	hsa04613	Neutrophil extracellular trap formation	10/90	190/8087	4.5282e-05	0.000819604	0.000724512	1536/2212/2357/6850/7099/7097/3684/2359/2209/728
down-regulated	Liver	Cycling-T	hsa05171	Coronavirus disease - COVID-19	10/90	232/8087	0.000238065	0.00307784	0.00272075	1536/2212/713/6203/6850/714/7099/7097/728/712
down-regulated	Liver	Cycling-T	hsa05202	Transcriptional misregulation in cancer	9/90	192/8087	0.000267125	0.0032233	0.00284933	6688/1436/4208/929/4005/2119/3684/1051/2209
down-regulated	Liver	MAST	hsa03010	Ribosome	26/252	158/8087	2.03272e-12	5.26474e-10	4.53617e-10	6206/6210/6158/6217/6155/6147/6160/6176/6167/6227/51023/7311/6202/6168/6181/6224/6137/6223/6207/200916/6156/6229/6135/10573/25873/6165
down-regulated	Liver	MAST	hsa05171	Coronavirus disease - COVID-19	27/252	232/8087	2.6142e-09	3.38538e-07	2.91689e-07	6206/6210/6158/6217/6155/6147/6160/6176/6167/6227/7311/6202/6168/3455/6181/6224/6137/6223/5970/6207/200916/6156/6229/6135/25873/6165/57506
down-regulated	Liver	MAST	hsa05166	Human T-cell leukemia virus 1 infection	19/252	219/8087	4.96541e-05	0.00402439	0.00346747	3689/109/4087/2114/5970/331/292/4088/1388/4801/3932/917/567/5567/1019/5901/9232/8881/7157
down-regulated	Liver	MAST	hsa05131	Shigellosis	20/252	246/8087	7.87801e-05	0.00402439	0.00346747	6352/51619/10097/10109/7311/26100/5970/9265/8454/382/7316/10095/823/27128/60/5216/824/10163/837/7157
down-regulated	Liver	MAST	hsa05012	Parkinson disease	20/252	249/8087	9.32292e-05	0.00402439	0.00346747	2771/514/5686/7327/801/7311/4731/5709/6391/4711/5690/7316/292/4704/5567/5688/5715/4695/7157/2773
down-regulated	Liver	MAST	hsa05132	Salmonella infection	20/252	249/8087	9.32292e-05	0.00402439	0.00346747	6281/79026/3840/5788/10097/10109/302/5970/9265/382/27072/83658/10095/27128/5606/60/5216/837/79792/841
down-regulated	Liver	MAST	hsa04210	Apoptosis	13/252	136/8087	0.000305707	0.0113112	0.00974584	8837/1520/5970/1647/331/6709/823/637/60/824/7157/841/1521
down-regulated	Liver	MAST	hsa05014	Amyotrophic lateral sclerosis	23/252	364/8087	0.000951291	0.0293458	0.0252847	514/847/7175/5686/4731/26100/5709/400916/6391/4711/5690/4704/57122/5903/5688/637/5606/60/5715/4695/5216/29979/7157
down-regulated	Liver	MAST	hsa04218	Cellular senescence	13/252	156/8087	0.00113273	0.0293458	0.0252847	678/801/4087/5970/1647/292/4088/823/1019/5606/824/83593/7157
down-regulated	Liver	MAST	hsa05135	Yersinia infection	12/252	137/8087	0.00113304	0.0293458	0.0252847	2533/10097/10109/3937/7409/5970/382/10095/3932/5606/60/10163
down-regulated	Liver	MAST	hsa05152	Tuberculosis	14/252	180/8087	0.00144282	0.0339719	0.0292707	972/4046/3689/11151/3920/1520/801/3313/5970/4801/637/51606/3587/841
down-regulated	Liver	MAST	hsa04015	Rap1 signaling pathway	15/252	210/8087	0.00230042	0.0496507	0.0427797	2771/3689/51466/5908/2533/3674/801/109/3937/7409/5606/60/5216/83593/2773
down-regulated	Lung	CD4-CD8-IFIT1	hsa03010	Ribosome	60/260	158/8087	4.22357e-50	1.07279e-47	9.69198e-48	9349/6154/6143/6165/7311/4736/6189/6139/6201/6176/6137/6233/6175/6227/6160/6202/6205/6158/6157/6235/6210/6125/6191/6135/2197/6187/6134/6181/6138/23521/6156/6168/6209/54460/6132/6188/6194/55052/6164/6229/6228/6130/6222/6167/6224/11224/25873/6230/6208/51081/6193/51065/6147/6141/6161/6124/6122/9045/6142/6152
down-regulated	Lung	CD4-CD8-IFIT1	hsa05171	Coronavirus disease - COVID-19	58/260	232/8087	1.10454e-36	1.40277e-34	1.26732e-34	9349/6154/6143/6165/7311/4736/6189/6139/6201/6176/6137/6233/6175/6227/6160/6202/6205/6158/6157/6235/6210/6125/6191/6135/2197/6187/6134/6181/6138/23521/6156/6168/5293/6209/6132/6188/6194/6164/6229/6228/6130/6222/6167/6224/11224/25873/6230/6208/6193/51065/6147/6141/6161/6124/6122/9045/6142/6152
down-regulated	Lung	CD4-CD8-IFIT1	hsa05012	Parkinson disease	27/260	249/8087	2.40738e-08	2.03825e-06	1.84143e-06	7311/5688/1329/9167/6233/4718/5691/4694/5685/5705/506/374291/7385/516/1537/5707/7326/55967/1345/1347/4705/4708/7318/498/9377/5713/808
down-regulated	Lung	CD4-CD8-IFIT1	hsa05016	Huntington disease	27/260	306/8087	1.61466e-06	0.000102531	9.26302e-05	5688/1329/9167/4718/5691/4694/5685/5705/506/374291/7385/5434/10121/516/1537/5707/55967/1345/5441/1347/4705/4708/5436/10120/498/9377/5713
down-regulated	Lung	CD4-CD8-IFIT1	hsa04714	Thermogenesis	22/260	231/8087	4.5765e-06	0.000213675	0.000193042	1329/9167/4718/4694/506/374291/71/7385/6194/516/1537/55967/116228/1345/1347/4705/60/4708/51241/3845/498/9377
down-regulated	Lung	CD4-CD8-IFIT1	hsa00190	Oxidative phosphorylation	16/260	133/8087	5.04744e-06	0.000213675	0.000193042	1329/9167/4718/4694/506/374291/7385/516/1537/55967/1345/1347/4705/4708/498/9377
down-regulated	Lung	CD4-CD8-IFIT1	hsa05020	Prion disease	24/260	273/8087	6.7381e-06	0.000244497	0.000220888	5688/1329/9167/4718/5691/4694/5685/5705/506/374291/1535/5293/7385/516/1537/5707/55967/1345/1347/4705/4708/498/9377/5713
down-regulated	Lung	CD4-CD8-IFIT1	hsa05014	Amyotrophic lateral sclerosis	28/260	364/8087	1.45735e-05	0.000462708	0.000418029	5688/1329/9167/4718/5691/4694/5685/5705/506/374291/71/310/7385/10121/516/1537/5707/55967/1345/1347/4705/60/4708/23225/10120/498/9377/5713
down-regulated	Lung	CD4-CD8-IFIT1	hsa03040	Spliceosome	16/260	151/8087	2.57128e-05	0.000725673	0.000655602	55119/151903/6636/51639/57187/11017/6628/51690/83443/6634/84991/55660/27258/25804/11157/199746
down-regulated	Lung	CD4-CD8-IFIT1	hsa04932	Non-alcoholic fatty liver disease	15/260	150/8087	9.01511e-05	0.00228984	0.00206873	1329/9167/4718/4694/356/374291/5293/7385/1537/55967/1345/1347/4705/4708/9377
down-regulated	Lung	CD4-CD8-IFIT1	hsa05022	Pathways of neurodegeneration - multiple diseases	31/260	475/8087	0.000120547	0.00278354	0.00251476	7311/5688/1329/9167/6233/4718/5691/4694/5685/5705/356/506/374291/7385/10121/516/1537/5707/7326/55967/1345/1347/4705/4708/7318/10120/3845/498/9377/5713/808
down-regulated	Lung	CD4-CD8-IFIT1	hsa05010	Alzheimer disease	25/260	369/8087	0.00032283	0.00683323	0.00617342	5688/1329/9167/4718/5691/4694/5685/5705/506/374291/5293/7385/516/1537/5707/55967/1345/1347/4705/4708/3845/498/9377/5713/808
down-regulated	Lung	CD4-CD8-IFIT1	hsa04660	T cell receptor signaling pathway	11/260	104/8087	0.000485003	0.00947621	0.00856118	387/3932/27040/959/5293/916/7535/926/5062/3845/917
down-regulated	Lung	CD4-CD8-IFIT1	hsa05135	Yersinia infection	12/260	137/8087	0.00148158	0.025088	0.0226655	387/3932/9138/27040/71/5293/7535/5585/3676/926/60/10096
down-regulated	Lung	CD4-LEF1-Treg	hsa05014	Amyotrophic lateral sclerosis	12/40	364/8087	1.02917e-07	1.14238e-05	8.66668e-06	514/1350/1327/517/5688/220988/1345/2521/1347/506/6432/5689
down-regulated	Lung	CD4-LEF1-Treg	hsa00190	Oxidative phosphorylation	8/40	133/8087	2.14051e-07	1.18798e-05	9.01266e-06	514/1350/1327/517/1345/9550/1347/506
down-regulated	Lung	CD4-LEF1-Treg	hsa05012	Parkinson disease	9/40	249/8087	2.55316e-06	9.44669e-05	7.16676e-05	514/1350/1327/517/5688/1345/1347/506/5689
down-regulated	Lung	CD4-LEF1-Treg	hsa05020	Prion disease	9/40	273/8087	5.44057e-06	0.000150976	0.000114538	514/1350/1327/517/5688/1345/1347/506/5689
down-regulated	Lung	CD4-LEF1-Treg	hsa05016	Huntington disease	9/40	306/8087	1.37197e-05	0.000304578	0.000231069	514/1350/1327/517/5688/1345/1347/506/5689
down-regulated	Lung	CD4-LEF1-Treg	hsa05010	Alzheimer disease	9/40	369/8087	6.03929e-05	0.00111727	0.00084762	514/1350/1327/517/5688/1345/1347/506/5689
down-regulated	Lung	CD4-LEF1-Treg	hsa05022	Pathways of neurodegeneration - multiple diseases	10/40	475/8087	7.61923e-05	0.00120819	0.000916599	514/1350/1327/517/5688/1345/2521/1347/506/5689
down-regulated	Lung	CD8-GNLY	hsa05020	Prion disease	8/45	273/8087	0.000110696	0.00675248	0.00565134	292/1340/1535/1329/203068/522/7388/4725
down-regulated	Lung	CD8-GZMK-FOS	hsa00190	Oxidative phosphorylation	27/288	133/8087	9.45683e-14	1.20698e-11	1.06055e-11	1327/1345/514/51079/7388/4697/1340/9551/4708/515/4695/54539/498/4707/9167/4696/1329/1350/1337/7385/518/539/8992/4713/529/4729/506
down-regulated	Lung	CD8-GZMK-FOS	hsa05014	Amyotrophic lateral sclerosis	45/288	364/8087	1.02286e-13	1.20698e-11	1.06055e-11	1327/1345/203068/514/51079/5714/7388/4697/1340/4708/515/2876/4695/54539/498/7175/23710/60/4707/71/10133/9167/5705/4696/1329/1350/7133/5689/1337/7385/518/3181/3178/5690/539/5719/7415/3799/4713/10382/5694/5216/10010/4729/506
down-regulated	Lung	CD8-GZMK-FOS	hsa05012	Parkinson disease	36/288	249/8087	3.52445e-13	2.77257e-11	2.4362e-11	1327/1345/203068/514/51079/5714/7388/4697/1340/4708/515/4695/54539/498/7317/4707/9167/5705/4696/1329/1350/5689/1337/7385/518/7311/5690/539/5719/3799/4713/10382/5694/7295/4729/506
down-regulated	Lung	CD8-GZMK-FOS	hsa05016	Huntington disease	39/288	306/8087	2.07351e-12	1.22337e-10	1.07495e-10	1327/1345/203068/514/51079/5714/7388/4697/1340/4708/515/2876/4695/54539/498/4707/9167/5705/548644/4696/1173/1329/1350/5689/1337/7385/518/5690/539/5719/5978/3799/4713/5441/10382/5694/841/4729/506
down-regulated	Lung	CD8-GZMK-FOS	hsa05020	Prion disease	35/288	273/8087	2.64431e-11	1.24811e-09	1.09669e-09	1327/1345/203068/514/51079/5714/7388/4697/1340/1460/4708/515/4695/54539/498/4707/9167/5705/4696/1329/1350/5689/1337/7385/518/5690/539/5719/3799/4713/10382/5694/4729/1535/506
down-regulated	Lung	CD8-GZMK-FOS	hsa05022	Pathways of neurodegeneration - multiple diseases	45/288	475/8087	1.01072e-09	3.97548e-08	3.49318e-08	1327/1345/203068/514/51079/5714/7388/4697/1340/1460/4708/515/2876/4695/54539/498/23710/7317/4707/10133/9167/5705/4696/1329/1350/824/7133/5689/1452/1337/7385/518/7311/5690/539/5719/7415/3799/4713/10382/5694/841/10010/4729/506
down-regulated	Lung	CD8-GZMK-FOS	hsa05010	Alzheimer disease	38/288	369/8087	2.35057e-09	7.32582e-08	6.43705e-08	1327/1345/2597/203068/514/51079/5714/7388/4697/1340/1460/4708/515/4695/54539/498/4707/9167/5705/4696/1329/1350/824/5689/1452/1337/7385/518/5690/539/5719/3799/4713/10382/5694/841/4729/506
down-regulated	Lung	CD8-GZMK-FOS	hsa04714	Thermogenesis	29/288	231/8087	2.48333e-09	7.32582e-08	6.43705e-08	1327/1345/514/51079/7388/4697/1340/9551/4708/515/4695/54539/498/60/4707/71/9167/4696/1329/1350/1337/7385/518/539/6605/6194/4713/4729/506
down-regulated	Lung	CD8-GZMK-FOS	hsa03010	Ribosome	23/288	158/8087	7.09835e-09	1.86135e-07	1.63553e-07	6122/6207/11224/51065/6191/6138/6169/6175/6136/6202/200916/2197/54460/6160/6231/6206/9045/7311/6168/6152/6194/6205/64968
down-regulated	Lung	CD8-GZMK-FOS	hsa04141	Protein processing in endoplasmic reticulum	21/288	171/8087	6.32725e-07	1.49323e-05	1.31207e-05	6746/811/10134/56681/23645/7184/824/6185/6748/5589/5034/7323/2923/23190/3998/7415/22872/10484/10905/10130/6184
down-regulated	Lung	CD8-GZMK-FOS	hsa04932	Non-alcoholic fatty liver disease	19/288	150/8087	1.36769e-06	2.93433e-05	2.57833e-05	1327/1345/51079/7388/4697/1340/4708/4695/54539/4707/9167/4696/1329/1350/1337/7385/4713/841/4729
down-regulated	Lung	CD8-GZMK-FOS	hsa05132	Salmonella infection	25/288	249/8087	2.46503e-06	4.8479e-05	4.25975e-05	2597/203068/375/10627/4074/10096/6993/7184/9648/60/7879/71/83658/79026/10109/387/23265/26999/3799/10382/837/841/7295/5216/399
down-regulated	Lung	CD8-GZMK-FOS	hsa05171	Coronavirus disease - COVID-19	23/288	232/8087	7.81621e-06	0.000141894	0.00012468	6122/6207/11224/51065/6191/6138/6169/6175/6136/6202/6772/200916/2197/6160/6231/6206/9045/9636/7311/6168/6152/6194/6205
down-regulated	Lung	CD8-GZMK-FOS	hsa03050	Proteasome	9/288	46/8087	2.80777e-05	0.00047331	0.000415888	5714/51371/5698/5699/5705/5689/5690/5719/5694
down-regulated	Lung	CD8-GZMK-FOS	hsa03040	Spliceosome	15/288	151/8087	0.000299653	0.00471453	0.00414257	55119/23451/3183/6430/27316/6625/9939/25804/3178/6633/6429/25949/51690/22916/6629
down-regulated	Lung	CD8-GZMK-FOS	hsa05130	Pathogenic Escherichia coli infection	17/288	197/8087	0.000637914	0.00940922	0.00826769	2597/203068/375/10096/4691/60/71/9138/10109/387/10972/26999/10382/837/841/10672/7456
down-regulated	Lung	CD8-GZMK-FOS	hsa05169	Epstein-Barr virus infection	17/288	202/8087	0.000847319	0.0117628	0.0103357	6892/916/960/5714/811/6890/567/6772/5705/896/9636/2923/5719/841/919/9541/4067
down-regulated	Lung	CD8-GZMK-FOS	hsa04145	Phagosome	14/288	152/8087	0.00101025	0.0132456	0.0116386	203068/811/4074/6890/3689/60/7879/71/2214/3916/8992/529/10382/1535
down-regulated	Lung	CD8-GZMK-FOS	hsa04612	Antigen processing and presentation	9/288	78/8087	0.00171605	0.0213151	0.0187291	6892/3812/811/6890/567/3822/3824/8302/2923
down-regulated	Lung	CD8-GZMK-FOS	hsa03018	RNA degradation	9/288	79/8087	0.00187764	0.0221561	0.0194681	3313/4848/25804/8761/2023/29883/54464/51690/4850
down-regulated	Lung	CD8-GZMK-FOS	hsa04670	Leukocyte transendothelial migration	11/288	114/8087	0.00238583	0.0268122	0.0235593	10627/83593/3689/60/71/4478/387/5908/3702/399/1535
down-regulated	Lung	CD8-GZMK-FOS	hsa03013	RNA transport	15/288	186/8087	0.00257022	0.0275715	0.0242265	3646/10921/7329/6613/7175/8661/1977/9939/8761/8894/26999/5411/22916/8666/8665
down-regulated	Lung	CD8-GZMK-FOS	hsa04260	Cardiac muscle contraction	9/288	87/8087	0.00365428	0.037496	0.032947	1327/1345/7388/1340/9167/1329/1350/1337/7385
down-regulated	Lung	CD8-GZMK-FOS	hsa04611	Platelet activation	11/288	124/8087	0.00458493	0.0450852	0.0396154	10627/60/71/5499/9138/4659/387/5908/10672/4067/83706
down-regulated	Lung	CD8-GZMK-FOS	hsa04810	Regulation of actin cytoskeleton	16/288	218/8087	0.00478128	0.0451353	0.0396595	10627/10096/3689/60/71/4478/7114/5499/9138/10109/4659/387/26999/5305/5216/10672
down-regulated	Lung	Neutrophil	hsa03010	Ribosome	62/82	158/8087	6.03367e-94	5.55098e-92	5.55098e-92	6222/6157/6147/6188/6208/6165/6141/6143/6136/6230/6155/9349/6217/6191/6168/6228/6202/9045/6207/6206/6205/6132/6175/4736/6161/6235/6134/6224/6137/6164/6187/6160/6223/6227/6204/6229/6125/6169/6154/6124/23521/6193/6156/6158/6138/6194/6181/6135/6210/6176/6234/6152/6167/25873/6159/6133/6142/6209/6233/6139/6201/6144
down-regulated	Lung	Neutrophil	hsa05171	Coronavirus disease - COVID-19	63/82	232/8087	1.05859e-83	4.86951e-82	4.86951e-82	6222/6157/6147/6188/6208/6165/6141/6143/6136/6230/6155/9349/6217/6191/6168/6228/6202/9045/6207/6206/6205/6132/6175/4736/6161/6235/6134/6224/6137/6164/6187/6160/6223/6227/6204/6229/6125/6169/6154/6124/23521/6193/6156/6158/6138/6194/6181/6135/6210/6176/6234/6152/6167/25873/6159/6133/6142/6209/6233/6139/6201/6144/114548
down-regulated	Melanoma	CD8-GNLY	hsa05012	Parkinson disease	30/163	249/8087	1.10177e-15	2.49e-13	2.18034e-13	1347/7332/801/5692/5689/9246/1337/27089/7416/7385/7846/7494/1350/55967/4710/2773/5714/11047/5685/7419/5706/126328/374291/7327/4694/5719/10376/4712/5701/5691
down-regulated	Melanoma	CD8-GNLY	hsa05020	Prion disease	28/163	273/8087	6.66778e-13	7.5346e-11	6.5976e-11	1347/5692/5689/1337/27089/7416/5295/7385/7846/1350/55967/4710/5714/11047/5685/7419/2534/5706/126328/374291/3312/4694/5719/5533/10376/4712/5701/5691
down-regulated	Melanoma	CD8-GNLY	hsa05014	Amyotrophic lateral sclerosis	30/163	364/8087	2.62316e-11	1.97611e-09	1.73036e-09	3178/1347/5692/4218/5689/1337/27089/7416/7385/7846/7494/1350/55967/4710/220988/5714/11047/5685/400916/5706/126328/374291/4694/5719/5533/80208/10376/4712/5701/5691
down-regulated	Melanoma	CD8-GNLY	hsa05016	Huntington disease	26/163	306/8087	3.40392e-10	1.92322e-08	1.68405e-08	1347/5692/5689/1337/27089/7416/7385/7846/1350/55967/5434/4710/5714/11047/5685/7419/5706/126328/374291/5435/4694/5719/10376/4712/5701/5691
down-regulated	Melanoma	CD8-GNLY	hsa05010	Alzheimer disease	28/163	369/8087	9.01141e-10	3.69127e-08	3.23222e-08	1347/801/5692/5689/1337/27089/7416/5295/7385/7846/7494/1350/55967/4710/5714/11047/5685/7419/5706/126328/374291/4694/5719/5533/10376/4712/5701/5691
down-regulated	Melanoma	CD8-GNLY	hsa05022	Pathways of neurodegeneration - multiple diseases	32/163	475/8087	9.79982e-10	3.69127e-08	3.23222e-08	1347/7332/801/5692/4218/5689/9246/1337/27089/7416/7385/7846/7494/1350/55967/4710/5714/11047/5685/7419/5706/126328/374291/7327/4694/5719/5533/80208/10376/4712/5701/5691
down-regulated	Melanoma	CD8-GNLY	hsa03050	Proteasome	10/163	46/8087	1.83228e-08	5.91565e-07	5.17998e-07	5692/5689/5696/5714/11047/5685/5706/5719/5701/5691
down-regulated	Melanoma	CD8-GNLY	hsa05017	Spinocerebellar ataxia	13/163	143/8087	5.56653e-06	0.000157254	0.000137698	5692/5689/7416/5295/7494/5714/11047/5685/7419/5706/5719/5701/5691
down-regulated	Melanoma	CD8-GNLY	hsa04932	Non-alcoholic fatty liver disease	13/163	150/8087	9.42244e-06	0.000236608	0.000207184	1347/1337/27089/5295/7385/7494/1350/55967/4710/126328/374291/4694/4712
down-regulated	Melanoma	CD8-GNLY	hsa00190	Oxidative phosphorylation	12/163	133/8087	1.39692e-05	0.000315703	0.000276442	1347/1337/27089/7385/1350/55967/4710/126328/374291/5464/4694/4712
down-regulated	Melanoma	CD8-GNLY	hsa04141	Protein processing in endoplasmic reticulum	13/163	171/8087	3.83999e-05	0.000788942	0.00069083	6500/7322/23471/3337/7494/10134/51035/22872/64215/811/7327/3312/23480
down-regulated	Melanoma	CD8-GNLY	hsa03010	Ribosome	11/163	158/8087	0.00033277	0.00626717	0.00548779	6232/3921/6170/6175/124995/6144/6234/51021/64968/6122/6132
down-regulated	Melanoma	CD8-GNLY	hsa04611	Platelet activation	9/163	124/8087	0.000862602	0.014996	0.0131311	54518/5295/103910/2773/7408/2534/9138/10235/23533
down-regulated	Melanoma	CD8-GNLY	hsa03013	RNA transport	11/163	186/8087	0.00130336	0.02104	0.0184235	8664/6613/8666/10284/3837/11171/10289/1964/4116/1968/7341
down-regulated	Melanoma	CD8-GNLY	hsa04714	Thermogenesis	12/163	231/8087	0.00239518	0.0360874	0.0315996	1347/1337/27089/7385/1350/55967/4710/25915/126328/374291/4694/4712
down-regulated	Melanoma	CD8-GNLY	hsa03040	Spliceosome	9/163	151/8087	0.00338167	0.0477661	0.041826	3178/6633/58517/6632/4670/220988/3312/4116/6625
down-regulated	Melanoma	CD8-SLC4A10-MAIT	hsa00190	Oxidative phosphorylation	11/92	133/8087	2.72151e-07	2.3525e-05	2.09338e-05	518/27089/54539/4715/1327/517/4707/7386/7388/521/10063
down-regulated	Melanoma	CD8-SLC4A10-MAIT	hsa04714	Thermogenesis	14/92	231/8087	2.83061e-07	2.3525e-05	2.09338e-05	518/27089/54539/4715/1327/6197/517/4707/7386/7388/25915/521/1385/10063
down-regulated	Melanoma	CD8-SLC4A10-MAIT	hsa05020	Prion disease	15/92	273/8087	3.63788e-07	2.3525e-05	2.09338e-05	518/5688/27089/7846/54539/5686/4715/1327/1535/517/4707/7386/7388/5695/1385
down-regulated	Melanoma	CD8-SLC4A10-MAIT	hsa05012	Parkinson disease	14/92	249/8087	7.06351e-07	3.4258e-05	3.04846e-05	518/5688/27089/7846/54539/5686/4715/4780/1327/517/4707/7386/7388/5695
down-regulated	Melanoma	CD8-SLC4A10-MAIT	hsa05016	Huntington disease	15/92	306/8087	1.55395e-06	6.02934e-05	5.36523e-05	518/5688/27089/7846/54539/5686/4715/1327/517/4707/7386/7388/5695/1211/1385
down-regulated	Melanoma	CD8-SLC4A10-MAIT	hsa05014	Amyotrophic lateral sclerosis	14/92	364/8087	5.59727e-05	0.00180978	0.00161044	518/5688/27089/7846/54539/5686/4715/1327/517/6428/4707/7386/7388/5695
down-regulated	Melanoma	CD8-SLC4A10-MAIT	hsa05010	Alzheimer disease	13/92	369/8087	0.000253473	0.00702483	0.00625107	518/5688/27089/7846/54539/5686/4715/1327/517/4707/7386/7388/5695
down-regulated	Melanoma	CD8-SLC4A10-MAIT	hsa05022	Pathways of neurodegeneration - multiple diseases	14/92	475/8087	0.000879521	0.0213284	0.0189791	518/5688/27089/7846/54539/5686/4715/1327/517/4707/7386/7388/5695/5579
down-regulated	Melanoma	Macrophage-C1QC-C3	hsa03010	Ribosome	33/141	158/8087	3.68181e-27	7.47408e-25	7.09234e-25	6232/6204/6133/6166/6164/6229/6161/6137/11224/6175/6143/6168/6194/9045/6235/6210/6181/6223/6147/6158/6233/6154/6206/6165/6155/6129/9349/6156/6228/6201/6205/25873/6160
down-regulated	Melanoma	Macrophage-C1QC-C3	hsa05171	Coronavirus disease - COVID-19	33/141	232/8087	1.47015e-21	1.4922e-19	1.41599e-19	6232/6204/6133/6166/6164/6229/6161/6137/11224/6175/6143/6168/6194/9045/6235/6210/6181/6223/6147/6158/6233/6154/6206/6165/6155/6129/9349/6156/6228/6201/6205/25873/6160
down-regulated	Melanoma	Macrophage-C1QC-C3	hsa05012	Parkinson disease	21/141	249/8087	1.6053e-09	1.08625e-07	1.03077e-07	1351/4697/1340/518/801/9377/29796/10476/1349/54205/126328/7295/6233/4710/9246/4707/5692/5690/7417/4709/7846
down-regulated	Melanoma	Macrophage-C1QC-C3	hsa05020	Prion disease	20/141	273/8087	4.51542e-08	2.20755e-06	2.09479e-06	1351/4697/1340/518/9377/29796/6647/4688/10476/1349/54205/126328/4710/4707/5692/1460/5690/7417/4709/7846
down-regulated	Melanoma	Macrophage-C1QC-C3	hsa05016	Huntington disease	21/141	306/8087	6.2462e-08	2.20755e-06	2.09479e-06	1351/4697/1340/518/9377/6507/29796/6647/10476/1349/54205/126328/4710/5441/4707/1211/5692/5690/7417/4709/7846
down-regulated	Melanoma	Macrophage-C1QC-C3	hsa00190	Oxidative phosphorylation	14/141	133/8087	6.52477e-08	2.20755e-06	2.09479e-06	1351/8992/4697/1340/9550/518/9377/29796/10476/1349/126328/4710/4707/4709
down-regulated	Melanoma	Macrophage-C1QC-C3	hsa05022	Pathways of neurodegeneration - multiple diseases	24/141	475/8087	1.96237e-06	5.69086e-05	5.40019e-05	1351/4697/1340/518/801/9377/29796/6647/10476/1349/54205/126328/8878/6233/4710/9246/4707/5692/1460/5690/7417/1452/4709/7846
down-regulated	Melanoma	Macrophage-C1QC-C3	hsa05014	Amyotrophic lateral sclerosis	20/141	364/8087	4.47093e-06	0.00011345	0.000107655	1351/4697/1340/518/9377/29796/6647/10476/1349/400916/54205/126328/8878/4710/4707/311/5692/5690/4709/7846
down-regulated	Melanoma	Macrophage-C1QC-C3	hsa05010	Alzheimer disease	20/141	369/8087	5.49549e-06	0.000123954	0.000117623	1351/4697/1340/518/801/9377/29796/10476/1349/54205/126328/4710/4707/5692/1460/5690/7417/1452/4709/7846
down-regulated	Melanoma	Macrophage-C1QC-C3	hsa04932	Non-alcoholic fatty liver disease	12/141	150/8087	1.08871e-05	0.000221009	0.000209721	998/1351/4697/1340/9377/29796/1349/54205/126328/4710/4707/4709
down-regulated	Melanoma	Macrophage-C1QC-C3	hsa04714	Thermogenesis	13/141	231/8087	0.000186391	0.00343976	0.00326407	1351/4697/1340/518/6194/9377/29796/10476/1349/126328/4710/4707/4709
down-regulated	Melanoma	Macrophage-C1QC-C3	hsa03013	RNA transport	10/141	186/8087	0.00148317	0.0231603	0.0219774	10209/8667/5901/10284/1974/8665/9939/1968/6612/8668
down-regulated	PDAC	CD4-CCR7-FOS	hsa03040	Spliceosome	13/180	151/8087	2.93782e-05	0.00385516	0.00333053	3192/10084/84991/11338/7919/151903/23020/10594/3183/9939/57461/25804/84950
down-regulated	PDAC	CD4-CCR7-FOS	hsa05130	Pathogenic Escherichia coli infection	15/180	197/8087	3.07184e-05	0.00385516	0.00333053	5861/7009/9368/841/10093/4542/8440/3725/3688/7280/26999/27128/10672/2597/81873
down-regulated	PDAC	CD4-CCR7-FOS	hsa05131	Shigellosis	15/180	246/8087	0.000371149	0.0310528	0.0268269	23048/10093/824/3725/3688/5293/7094/3611/6352/10241/23710/27128/831/5216/81873
down-regulated	PDAC	CD4-CTLA4-Treg	hsa04060	Cytokine-cytokine receptor interaction	9/24	295/8087	8.17634e-08	9.97514e-06	3.95907e-06	1237/3574/3554/90/1233/1439/3570/943/1234
down-regulated	PDAC	Macrophage-AREG	hsa04060	Cytokine-cytokine receptor interaction	10/65	295/8087	0.000108136	0.00756952	0.00643125	8741/3552/3627/3624/9966/2920/2921/8793/3553/4283
down-regulated	PDAC	Macrophage-C1QC-PLTP	hsa05323	Rheumatoid arthritis	9/49	93/8087	3.34208e-09	4.80379e-07	4.07901e-07	8741/6387/2921/6349/3552/6347/3576/2919/2920
down-regulated	PDAC	Macrophage-C1QC-PLTP	hsa04061	Viral protein interaction with cytokine and cytokine receptor	9/49	100/8087	6.40505e-09	4.80379e-07	4.07901e-07	6387/2921/6355/3627/6349/6347/3576/2919/2920
down-regulated	PDAC	Macrophage-C1QC-PLTP	hsa04064	NF-kappa B signaling pathway	8/49	104/8087	1.66268e-07	8.31341e-06	7.05911e-06	6387/5743/2921/3576/2919/29760/5328/2920
down-regulated	PDAC	Macrophage-C1QC-PLTP	hsa04060	Cytokine-cytokine receptor interaction	11/49	295/8087	1.06763e-06	3.96082e-05	3.36322e-05	8741/6387/2921/6355/3627/6349/3552/6347/3576/2919/2920
down-regulated	PDAC	Macrophage-C1QC-PLTP	hsa04062	Chemokine signaling pathway	9/49	192/8087	1.79683e-06	4.49208e-05	3.81433e-05	6387/2921/6355/3627/6349/6347/3576/2919/2920
down-regulated	PDAC	Macrophage-SPP1-ACP5	hsa04060	Cytokine-cytokine receptor interaction	9/27	295/8087	2.6605e-07	1.14402e-05	7.14136e-06	8741/2920/3553/2921/4283/6374/8808/3569/3552
down-regulated	PDAC	Monocyte-FCGR3A-nonClassic	hsa04010	MAPK signaling pathway	10/52	294/8087	1.41153e-05	0.00244195	0.00212473	6237/3303/3553/3304/4208/3082/3312/3164/56034/5598
down-regulated	PDAC	NK-FCGR3A	hsa04650	Natural killer cell mediated cytotoxicity	10/140	131/8087	8.50186e-05	0.0195543	0.0178092	9437/3823/3804/2215/22914/4773/3458/5293/3683/117157
down-regulated	PDAC	NK-FCGR3A	hsa04666	Fc gamma R-mediated phagocytosis	8/140	97/8087	0.000260896	0.030003	0.0273254	4067/2215/3635/5293/3984/10000/10097/56848
