# Supplementary material for: Single-Cell Analysis of the Pan-Cancer Immune Microenvironment and scTIME Portal
Source: Oxford University Press journal article supplement (doi:10.1158/2326-6066.cir-20-1026), 2021-06-11
Supplement: cir-20-1026_table_s6_suppst6.xlsx [file cir-20-1026_table_s6_suppst6.xlsx]

## Sheet: perc.lr
Cell fraction	LR strength	R	pvalue
CD4-CCR7-FOS	Macrophage-CXCL10|CD4-CCR7-FOS	0.9	0.01
CD4-CCR7-FOS	Macrophage-C1QC-PLTP|CD4-CCR7-FOS	0.84	0.04
CD4-CCR7-FOS	Macrophage-SPP1-ACP5|CD4-CCR7-FOS	0.84	0.04
CD4-CCR7-FOS	Macrophage-AREG|CD4-CCR7-FOS	0.84	0.04
CD4-CCR7-FOS	Macrophage-IL1B|CD4-CCR7-FOS	0.84	0.04
CD4-CXCL13-Tfh	Macrophage-MARCO|CD4-CXCL13-Tfh	0.77	0.04
CD8-GZMK-FOS	Macrophage-AREG|CD8-GZMK-FOS	0.85	0.02
CD8-GZMK-FOS	Macrophage-CXCL10|CD8-GZMK-FOS	0.85	0.02
CD8-GZMK-FOS	Macrophage-C1QC-PLTP|CD8-GZMK-FOS	0.77	0.04
CD8-HSPA1A	Macrophage-C1QC-C3|CD8-HSPA1A	-0.82	0.03
CD8-PDCD1	Macrophage-C1QC-PLTP|CD8-PDCD1	0.86	0.02
CD8-ZNF683	Macrophage-SPP1-CLEC5A|CD8-ZNF683	0.82	0.03
Macrophage-C1QC-PLTP	Macrophage-C1QC-PLTP|CD4-CXCL13-Tfh	0.82	0.03
Macrophage-CXCL10	Macrophage-CXCL10|CD8-GZMK-FOS	0.92	0
Macrophage-CXCL10	Macrophage-CXCL10|CD8-SLC4A10-MAIT	0.86	0.02
Macrophage-IL1B	Macrophage-IL1B|CD4-CD8-IFIT1	-0.86	0.02
Macrophage-SPP1-CLEC5A	Macrophage-SPP1-CLEC5A|CD4-CTLA4-Treg	0.82	0.03
