# Supplementary material for: Single-Cell Analysis of the Pan-Cancer Immune Microenvironment and scTIME Portal
Source: Oxford University Press journal article supplement (doi:10.1158/2326-6066.cir-20-1026), 2021-06-11
Supplement: cir-20-1026_table_s7_suppst7.xlsx [file cir-20-1026_table_s7_suppst7.xlsx]

## Sheet: Sheet1
ID	Dataset	Technology	Species	Cancer	Number of cells	Number of individuals	Type of data obtained	PMID	Publication
1	GSE98638	Smart-seq2	Homo sapiens	Hepatocellular carcinoma	5063	6	Expression Matrix	28622514	Landscape of Infiltrating T Cells in Liver Cancer Revealed by Single-Cell Sequencing
2	GSE99254	Smart-seq2	Homo sapiens	Non-small cell lung cancer	11769	14	Expression Matrix	29942094	Global characterization of T cells in non-small-cell lung cancer by single-cell sequencing
3	GSE72056	Smart-seq2	Homo sapiens	Melanoma	4645	19	Expression Matrix	27124452	Dissecting the multicellular ecosystem of metastatic melanoma by single-cell RNA-seq
4	GSE84465	Smart-seq2	Homo sapiens	Astrocytoma	3567	4	Expression Matrix	29091775	Single-Cell RNA-Seq Analysis of Infiltrating Neoplastic Cells at the Migrating Front of Human Glioblastoma
5	GSE127465	InDrop-seq	Homo sapiens	Non-small cell lung cancer	53215	7	Expression Matrix	30979687	Single-Cell Transcriptomics of Human and Mouse Lung Cancers Reveals Conserved Myeloid Populations across Individuals and Species
6	GSE114725	InDrop v2	Homo sapiens	Breast cancer	47016	8	Expression Matrix	29961579	Single-Cell Map of Diverse Immune Phenotypes in the Breast Tumor Microenvironment
7	GSE115978	Smart-seq2	Homo sapiens	Melanoma	7186	31	Expression Matrix	30388455	A Cancer Cell Program Promotes T Cell Exclusion and Resistance to Checkpoint Blockade
8	GSE103322	Smart-seq2	Homo sapiens	Head and neck squamous cell carcinoma	5902	18	Expression Matrix	29198524	Single-Cell Transcriptomic Analysis of Primary and Metastatic Tumor Ecosystems in Head and Neck Cancer
9	GSE149652	10X Genomics	Homo sapiens	Bladder cancer	30604	7	Expression Matrix	32497499	Intratumoral CD4(+) T Cells Mediate Anti-tumor Cytotoxicity in Human Bladder Cancer
10	CRA001160	10X Genomics	Homo sapiens	Pancreatic ductal adenocarcinoma	57530	35	Expression Matrix	31273297	Single-cell RNA-seq highlights intra-tumoral heterogeneity and malignant progression in pancreatic ductal adenocarcinoma
11	GSE123139	MARS-seq	Homo sapiens	Melanoma	46191	24	Expression Matrix	30595452	Dysfunctional CD8 T Cells Form a Proliferative, Dynamically Regulated Compartment within Human Melanoma
12	GSE125449	10X Genomics	Homo sapiens	Liver cancer	9946	19	Expression Matrix	31588021	Tumor Cell Biodiversity Drives Microenvironmental Reprogramming in Liver Cancer
13	GSE146771	10X Genomics,Smart-seq2	Homo sapiens	Colon cancer	54285	18	Expression Matrix	32302573	Single-Cell Analyses Inform Mechanisms of Myeloid-Targeted Therapies in Colon Cancer
14	GSE110686	10X Genomics	Homo sapiens	Triple-negative breast cancer	6311	2	Expression Matrix	29942092	Single-cell profiling of breast cancer T cells reveals a tissue-resident memory subset associated with improved prognosis
15	GSE108989	Smart-seq2	Homo sapiens	Colorectal cancer	8530	12	Expression Matrix	30479382	Lineage tracking reveals dynamic relationships of T cells in colorectal cancer
16	GSE131907	10X Genomics	Homo sapiens	Lung adenocarcinoma	208506	44	Expression Matrix	32385277	Single-cell RNA sequencing demonstrates the molecular and cellular reprogramming of metastatic lung adenocarcinoma
17	GSE142784	10X Genomics	Homo sapiens	Intrahepatic cholangiocarcinoma	5315	2	Expression Matrix	32505533	Single cell transcriptomic architecture and intercellular crosstalk of human intrahepatic cholangiocarcinoma
18	GSE134520	10X Genomics	Homo sapiens	Gastric cancer	32331	9	Expression Matrix	31067475	Dissecting the Single-Cell Transcriptome Network Underlying Gastric Premalignant Lesions and Early Gastric Cancer
19	GSE117570	10X Genomics	Homo sapiens	Non-small cell lung cancer	9705	4	Expression Matrix	31033233	Dissecting intratumoral myeloid cell plasticity by single cell RNA-seq
20	GSE139249	10X Genomics	Homo sapiens	Melanoma	40205	5	Expression Matrix	31801909	Discovery of specialized NK cell populations infiltrating human melanoma metastases
21	GSE111360	10X Genomics	Homo sapiens	Kidney cancer	84620	5	Expression Matrix	30550791	Organoid Modeling of the Tumor Immune Microenvironment
22	GSE138709	10X Genomics	Homo sapiens	Intrahepatic cholangiocarcinoma	30729	5	Expression Matrix	32505533	Single cell transcriptomic architecture and intercellular crosstalk of human intrahepatic cholangiocarcinoma
23	GSE120575	Smart-seq2	Homo sapiens	Melanoma	16291	32	Expression Matrix	30633907	Defining T Cell States Associated with Response to Checkpoint Immunotherapy in Melanoma
24	GSE114724	10X Genomics	Homo sapiens	Breast cancer	28013	3	Expression Matrix	29961579	Single-Cell Map of Diverse Immune Phenotypes in the Breast Tumor Microenvironment
25	GSE139829	10X Genomics	Homo sapiens	Uveal melanoma	59916	11	Expression Matrix	31980621	Single-cell analysis reveals new evolutionary complexity in uveal melanoma
26	GSE145140	10X Genomics	Homo sapiens	Bladder cancer	2075	1	Expression Matrix	32460812	Single-cell RNA sequencing reveals the tumor microenvironment and facilitates strategic choices to circumvent treatment failure in a chemorefractory bladder cancer patient
27	GSE150321	BD Rhapsody	Homo sapiens	Laryngeal squamous cell carcinoma	16869	2	Expression Matrix	32638385	Cellular Heterogeneity Landscape in Laryngeal Squamous Cell Carcinoma
28	phs001818.v1.p1	10X Genomics	Homo sapiens	Gastrointestinal cancer	56167	8	Expression Matrix	32060101	Single-Cell Genomic Characterization Reveals the Cellular Reprogramming of the Gastric Tumor Microenvironment
29	GSE115007	10X Genomics	Homo sapiens	Ovarian cancer	8404	4	Expression Matrix	29967419	Human in vivo-generated monocyte-derived dendritic cells and macrophages cross-present antigens through a vacuolar pathway
30	GSE97168	MARS-seq	Homo sapiens	Lung adenocarcinoma	1473	1	Expression Matrix	28475900	Innate Immune Landscape in Early Lung Adenocarcinoma by Paired Single-Cell Analyses
31	GSE81861	Smart-seq	Homo sapiens	Colorectal cancer	579	11	Expression Matrix	28319088	Reference component analysis of single-cell transcriptomes elucidates cellular heterogeneity in human colorectal tumors
32	GSE110499	10X Genomics	Homo sapiens	Multiple myeloma	1339	1	Expression Matrix	31558476	Alterations in the Transcriptional Programs of Myeloma Cells and the Microenvironment during Extramedullary Progression Affect Proliferation and Immune Evasion
33	GSE145281	10X Genomics	Homo sapiens	Metastatic renal cell carcinoma（RCC）	31030	4	Expression Matrix	32405063	High systemic and tumor-associated IL-8 correlates with reduced clinical benefit of PD-L1 blockade
34	GSE145281	10X Genomics	Homo sapiens	Metastatic urothelial cell carcinoma（UC）	14474	10	Expression Matrix	32405063	High systemic and tumor-associated IL-8 correlates with reduced clinical benefit of PD-L1 blockade				PBMC
35	GSE140228	10X Genomics;Smart-seq2	Homo sapiens	Hepatocellular carcinoma	72905	10	Expression Matrix	31675496	Landscape and Dynamics of Single Immune Cells in Hepatocellular Carcinoma
36	GSE118056	10X Genomics	Homo sapiens	Merkel cell carcinoma	11071	1	Expression Matrix	30250229	Acquired cancer resistance to combination immunotherapy from transcriptional loss of class I HLA						Tumor material not required for clinical pathology analysis was placed in RPMI. Tumor was mechanically minced with scissors and forceps into small pieces and then resuspended in 20 mL freshly prepared digestion medium
37	GSE127471	10X Genomics	Homo sapiens	Non-small cell lung cancer	1055	1	Expression Matrix	31061481	Determining cell type abundance and expression from bulk tissues with digital cytometry
38	GSE148190	10X Genomics	Homo sapiens	Melanoma	27935	3	Expression Matrix	32539073	Layilin augments integrin activation to promote antitumor immunity	Matched tissue scRNA-seq of CD8+ T cells isolated from patient K-411.
39	GSE117988	10X Genomics	Homo sapiens	Merkel cell carcinoma	18396	1	Expression Matrix	30250229	Acquired cancer resistance to combination immunotherapy from transcriptional loss of class I HLA
40	GSE136394	10X Genomics	Homo sapiens	Metastatic colorectal cancer	73585	5	Expression Matrix	31484655	Single-Cell Transcriptome Analysis Reveals Gene Signatures Associated with T-cell Persistence Following Adoptive Cell Therapy
41	GSE131928	Smart-seq2	Homo sapiens	IDH-wildtype Glioblastomas	7930	28	Expression Matrix	31327527	An Integrative Model of Cellular States, Plasticity, and Genetics for Glioblastoma	Fresh tumors were collected
42	GSE138794	10X Genomics	Homo sapiens	Glioma	20278	10	Expression Matrix	31554641	The Phenotypes of Proliferating Glioblastoma Cells Reside on a Single Axis of Variation	For fresh tissues, 10.2 μL of live cells, at a concentration of 1,700 live cells/μL, were loaded into the 10X Chromium Single Cell Capture Chip. For frozen tissues, approximately 15,000 nuclei were loaded per capture. Single-cell/nucleus capture, reverse transcription, cell lysis, and library preparation were performed per the manufacturer's protocol. Sequencing was performed on an Illumina NovaS…
43	GSE139555	10X Genomics	Homo sapiens	Colorectal adenocarcinoma	200626	2	Expression Matrix	32103181	Peripheral T cell expansion predicts tumour infiltration and clinical response
				Endometrial adenocarcinoma		3
				Renal clear cell carcinoma		3
				Non-small cell lung adenocarcinoma		6
44	GSE140819	10X Genomics	Homo sapiens	Chronic lymphocytic leukemia	62810	1	Expression Matrix	32405060	A single-cell and single-nucleus RNA-Seq toolbox for fresh and frozen human tumors
				Glioma		1
				Lung cancer		2
				Metastatic breast cancer		4
				Neuroblastoma		3
				Ovarian cancer		2
45	GSE123813	10X Genomics	Homo sapiens	Basal cell carinoma	79046	12	Expression Matrix	31359002	Clonal replacement of tumor-specific T cells following PD-1 blockade
				Squamous cell carcinoma		3
46	GSE75688	Smart-seq	Homo sapiens	Breast cancer	515	11	Expression Matrix	28474673	Single-cell RNA-seq enables comprehensive tumour and immune cell profiling in primary breast cancer
				Metastatic breast cancer		2
47	GSE127465	InDrop-seq	Mus musculus	Non-small cell lung cancer	15939	4	Expression Matrix	30979687	Single-Cell Transcriptomics of Human and Mouse Lung Cancers Reveals Conserved Myeloid Populations across Individuals and Species
48	GSE119352	10X Genomics	Mus musculus	Sarcoma	14492	3	Expression Matrix	30343900	High-Dimensional Analysis Delineates Myeloid and Lymphoid Compartment Remodeling during Successful Immune-Checkpoint Cancer Therapy
49	GSE145140	10X Genomics	Mus musculus	Bladder cancer	958	2	Expression Matrix	32460812	Single-cell RNA sequencing reveals the tumor microenvironment and facilitates strategic choices to circumvent treatment failure in a chemorefractory bladder cancer patient
